# Supplementary material for: Microbial dynamics and metabolite changes in Chinese Rice Wine fermentation from sorghum with different tannin content
Source: PubMed Central journal article supplement (PMC5854674; doi:10.1038/s41598-018-23013-1), 2018-03-15
Supplement: 41598_2018_23013_MOESM1_ESM.pdf [file 41598_2018_23013_MOESM1_ESM.pdf]

Microbial dynamics and metabolite changes in Chinese Rice Wine fermentation from sorghum with different tannin content

Jialiang Xu, Huijun Wu, Zhiwei Wang, Fuping Zheng, Xin Lu, Zhenpeng Li, Qing Ren

Table. S1 Changes in acid, reducing sugar and alcohol found in JZ22(a) and JB3(b) Chinese Rice Wine brewed from Sorghum during fermentation. Every value is expressed as means  $\pm$  standard error (n=3).

a

| JZ22<br>Compounds(<br>g/L) | Fermentation time (days) |                        |                     |                     |                     |                         |                         | pvalue        | Correl<br>ation<br>coeffic<br>ient |
|----------------------------|--------------------------|------------------------|---------------------|---------------------|---------------------|-------------------------|-------------------------|---------------|------------------------------------|
|                            | 0 day                    | 2 <sup>nd</sup><br>day | 4 <sup>th</sup> day | 6 <sup>th</sup> day | 8 <sup>th</sup> day | 10 <sup>th</sup><br>day | 12 <sup>th</sup><br>day |               |                                    |
| Acid                       | 2.70 $\pm$<br>0.09       | 3.63 $\pm$<br>0.18     | 3.85 $\pm$<br>0.09  | 5.09 $\pm$<br>0.07  | 6.54 $\pm$<br>0.12  | 7.33 $\pm$<br>0.10      | 7.91 $\pm$<br>0.07      | 0.0039<br>83  | -0.91                              |
| reducing<br>sugar          | 18.29<br>$\pm$ 0.19      | 19.85<br>$\pm$ 0.24    | 17.54<br>$\pm$ 0.34 | 17.03<br>$\pm$ 0.19 | 16.68<br>$\pm$ 0.35 | 15.14<br>$\pm$ 0.15     | 14.73<br>$\pm$ 0.27     | 2.556e<br>-05 | 0.99                               |
| alcohol                    | 2.9 $\pm$ 0.<br>21       | 5.7 $\pm$ 0.<br>22     | 8.9 $\pm$ 0.<br>45  | 9.8 $\pm$ 0.<br>14  | 10.5 $\pm$<br>0.21  | 10.9 $\pm$<br>0.22      | 11.1 $\pm$ 0<br>.22     | 0.0042<br>41  | 0.91                               |

b

| JB3<br>Compounds(<br>g/L) | Fermentation time (days) |                        |                     |                     |                     |                         |                         | pvalue        | Correl<br>ation<br>coeffic<br>ient |
|---------------------------|--------------------------|------------------------|---------------------|---------------------|---------------------|-------------------------|-------------------------|---------------|------------------------------------|
|                           | 0 day                    | 2 <sup>nd</sup><br>day | 4 <sup>th</sup> day | 6 <sup>th</sup> day | 8 <sup>th</sup> day | 10 <sup>th</sup><br>day | 12 <sup>th</sup><br>day |               |                                    |
| Acid                      | 1.8 $\pm$ 0.<br>15       | 2.86 $\pm$<br>0.16     | 3.78 $\pm$<br>0.31  | 4.93 $\pm$<br>0.15  | 5.38 $\pm$<br>0.22  | 6.54 $\pm$<br>0.24      | 7.89 $\pm$<br>0.30      | 0.0001<br>436 | -0.98                              |
| reducing<br>sugar         | 20.64<br>$\pm$ 0.23      | 19.25<br>$\pm$ 0.16    | 17.61<br>$\pm$ 0.14 | 17.23<br>$\pm$ 0.19 | 16.67<br>$\pm$ 0.21 | 15.72<br>$\pm$ 0.25     | 15.15<br>$\pm$ 0.12     | 2.259e<br>-06 | 1.00                               |
| alcohol                   | 3.1 $\pm$ 0.<br>08       | 4.3 $\pm$ 0.<br>14     | 6.5 $\pm$ 0.<br>22  | 9.2 $\pm$ 0.<br>17  | 9.6 $\pm$ 0.<br>22  | 10.4 $\pm$<br>0.08      | 10.8 $\pm$<br>0.14      | 0.0005<br>339 | 0.96                               |

Table.S2 Changes in organic acids found in JZ22(a) and JB3(b) Chinese Rice Wine during fermentation. Every value is expressed as means  $\pm$  standard error (n = 3).

a

| JZ22 | Fermentation time (days) |
|------|--------------------------|
|------|--------------------------|

| Organic acid (mg/L) | 0 day            | 2 <sup>nd</sup> day | 4 <sup>th</sup> day | 6 <sup>th</sup> day | 8 <sup>th</sup> day | 10 <sup>th</sup> day | 12 <sup>th</sup> day |
|---------------------|------------------|---------------------|---------------------|---------------------|---------------------|----------------------|----------------------|
| Oxalic acid         | 1.03±0           | 4.21±0.1<br>3       | 4.99±0.0<br>1       | 5.64±0.0<br>4       | 5.79±0.0<br>9       | 7.09±2.0<br>6        | 7.93±0.5<br>4        |
| Tartaric acid       | 25.71±3.<br>68   | 30.65±2.<br>75      | 38.83±0.<br>14      | 38.98±0.<br>12      | 48.87±0.<br>19      | 51.55±0.<br>02       | 56.72±0.<br>31       |
| Pyruvic acid        | 0.71±0.0<br>3    | 1.64±0.0<br>1       | 22.96±0.<br>41      | 22.25±0.<br>80      | 15.93±0.<br>34      | 15.23±0.<br>07       | 14.09±0.<br>01       |
| Malic acid          | 22.06±0.<br>20   | 27.17±2.<br>09      | 36.85±0.<br>01      | 38.02±0.<br>28      | 48.70±0.<br>63      | 52.41±3.<br>06       | 58.86±5.<br>31       |
| α-ketoglutaric acid | 20.59±3.<br>12   | 18.44±0.<br>24      | 12.03±0.<br>29      | 8.60±0.1<br>3       | 8.27±0.0<br>8       | 11.72±0.<br>34       | 9.92±0.2<br>8        |
| Lactic acid         | 156.44±3<br>3.79 | 999.67±4<br>.43     | 1350.52±<br>2.29    | 1366.41±<br>18.29   | 1449.45±<br>5.05    | 1640.75±<br>9.42     | 1646.58±<br>10.33    |
| Citric acid         | 3.71±0.0<br>2    | 17.42±0.<br>12      | 18.19±0.<br>14      | 19.35±0.<br>12      | 19.77±0.<br>27      | 22.90±0.<br>09       | 26.14±0.<br>07       |
| Succinic acid       | 70.26±8.<br>00   | 87.05±26<br>.40     | 859.81±4<br>.98     | 1236.97±<br>2.86    | 1458.78±<br>0.28    | 1771.71±<br>4.71     | 1954.38±<br>0.39     |

b

| JB3                 | Fermentation time (days) |                     |                     |                     |                     |                      |                      |
|---------------------|--------------------------|---------------------|---------------------|---------------------|---------------------|----------------------|----------------------|
| Organic acid (mg/L) | 0 day                    | 2 <sup>nd</sup> day | 4 <sup>th</sup> day | 6 <sup>th</sup> day | 8 <sup>th</sup> day | 10 <sup>th</sup> day | 12 <sup>th</sup> day |
| oxalic acid         | 1.03±0                   | 3.32±0.0<br>1       | 4.52±0.1<br>2       | 7.79±0.0<br>6       | 8.52±0.0<br>2       | 9.37±0.1<br>6        | 10.68±0.<br>15       |
| Tartaric Acid       | 4.67±0.7                 | 48.22±0.<br>96      | 48.22±3.<br>21      | 53.59±1.<br>40      | 58.03±0.<br>73      | 59.58±1.<br>88       | 70.11±1.<br>37       |
| pyruvic acid        | 0.50±0.0<br>1            | 1.38±0.0<br>2       | 1.72±0.0<br>4       | 1.59±0.0<br>1       | 1.28±0.0<br>6       | 1.29±0.0<br>8        | 1.17±0.0<br>2        |
| malic acid          | 24.55±0.<br>74           | 32.59±1.<br>62      | 46.87±0.<br>23      | 48.10±0.<br>09      | 50.06±8.<br>95      | 58.72±0.<br>07       | 62.83±2.<br>04       |
| α-ketoglutaric acid | 1.05±0.3<br>1            | 8.35±0.6<br>8       | 6.83±0.3<br>3       | 5.50±0.5<br>7       | 4.16±0.1<br>4       | 5.56±0.1<br>5        | 5.24±0.5<br>6        |

|               |          |          |          |          |          |          |          |
|---------------|----------|----------|----------|----------|----------|----------|----------|
| lactic acid   | 86.69±0. | 1048.63± | 1351.92± | 1536.10± | 1768.18± | 2233.19± | 2084.23± |
|               | 89       | 18.14    | 36.80    | 6.06     | 2.971    | 47.18    | 7.39     |
| citric acid   | 8.10±00. | 15.89±0. | 17.54±0. | 17.99±0. | 21.08±0. | 21.96±0. | 20.34±0. |
|               | 15       | 42       | 49       | 50       | 20       | 38       | 20       |
| Succinic acid | 150.19±1 | 182.35±0 | 634.74±5 | 687.69±0 | 863.81±1 | 1077.04± | 942.43±7 |
|               | .55      | .21      | .09      | .49      | 4.62     | 3.62     | 0.73     |

Table.S3 Changes in volatile compounds in JZ22(a) and JB3(b) Chinese Rice Wine during fermentation.

a

| Relative content of volatile compounds in Jz22 fermentation stages(mg/l) |                                   |       |       |       |       |       |        |       |
|--------------------------------------------------------------------------|-----------------------------------|-------|-------|-------|-------|-------|--------|-------|
| No.                                                                      | Compounds                         | Day 0 | Day 2 | Day 4 | Day 6 | Day 8 | Day 10 | Day12 |
| alkane                                                                   |                                   |       |       |       |       |       |        |       |
|                                                                          | Heneicosane                       | 0.05  |       | 4.76  | 3.13  | 2.79  |        |       |
|                                                                          | Pentacosane                       | 1.50  |       | 49.86 |       | 12.68 |        |       |
|                                                                          | Tetratriacontane                  | 0.12  |       | 2.08  | 6.08  |       |        |       |
|                                                                          | 2,4,4-trimethyl-Hexane            |       | 0.11  |       |       |       |        |       |
|                                                                          | 2,6,10,15-tetramethyl-Heptadecane |       | 0.31  |       |       |       |        |       |
|                                                                          | 3,7-dimethyl-Nonane               | 0.01  | 0.12  | 0.11  | 0.57  |       | 0.87   |       |
|                                                                          | 3,8-dimethyl-Decane               | 0.02  |       |       |       |       |        |       |
|                                                                          | 3-methyl-Undecane                 |       | 0.18  |       |       |       |        | 0.50  |
|                                                                          | 2,6,10-trimethyl-Dodecane         | 0.01  |       |       |       |       |        |       |
|                                                                          | 2,6,10,15-tetramethyl-Heptadecane |       |       |       | 2.23  |       |        | 6.61  |
|                                                                          | 2-ethoxy-Propane                  |       |       | 0.58  | 1.69  |       |        |       |
|                                                                          | Cyclodecane                       |       |       | 0.16  |       |       |        |       |
|                                                                          | 2-Bromo dodecane                  |       |       |       |       | 0.78  |        |       |
|                                                                          | ethoxymethyl Oxirane              |       |       |       | 0.12  |       |        |       |
|                                                                          | 1,1'-Bicycloheptyl                |       |       |       |       |       |        | 0.08  |
|                                                                          | diethyl(decyloxy)-Borane          |       |       |       |       |       |        | 1.29  |
| alcohol                                                                  |                                   |       |       |       |       |       |        |       |
|                                                                          | 1-Propanol                        |       | 1.26  | 0.57  | 6.12  | 2.63  | 11.60  | 6.45  |
|                                                                          | 1-Butanol                         |       | 0.06  |       | 0.33  | 0.18  | 0.69   | 0.72  |

|                               |      |       |       |        |       |        |        |
|-------------------------------|------|-------|-------|--------|-------|--------|--------|
| 2-methyl-1-Propanol           | 0.04 | 4.44  | 2.42  | 22.11  | 10.96 | 40.98  | 25.77  |
| 1-Pentanol                    | 0.01 |       |       |        |       |        |        |
| 3-methyl-1-Butanol            | 0.07 | 25.51 | 17.12 | 113.19 | 73.88 | 198.80 | 172.43 |
| 1-Hexanol                     | 0.04 | 0.14  | 0.14  | 0.62   | 0.61  | 1.40   | 1.58   |
| 1-Heptanol                    |      | 1.04  |       |        |       |        |        |
| 6-methyl-2-Heptanol           |      |       |       |        |       |        | 1.30   |
| 1-Octanol                     | 0.01 |       | 0.04  |        | 0.20  | 0.36   | 0.46   |
| 1-Nonanol                     |      |       |       |        |       | 1.05   | 1.54   |
| 1-Undecanol                   | 0.01 |       |       | 0.59   |       |        |        |
| 2-Furanmethanol               | 0.03 |       |       |        |       |        |        |
| 2-ethyl-2-methyl-Tridecanol   |      | 0.29  |       |        |       |        |        |
| 1-methoxy-2-Butanol           |      |       |       |        |       | 1.96   |        |
| 3-ethoxy-1-Propanol           |      | 0.05  |       |        |       | 0.77   |        |
| 2-(2-butoxyethoxy)-Ethanol    |      | 0.18  |       |        |       |        |        |
| 1-(1-methylethoxy)-2-Propanol |      | 0.65  |       |        |       |        |        |
| 1,2-Propanediol               |      |       |       |        |       | 5.38   | 2.73   |
| Glycerin                      | 0.03 | 8.36  | 24.27 | 83.56  | 51.26 | 140.53 | 258.38 |
| 2,3-Butanediol                | 0.88 | 11.71 | 12.37 | 28.56  | 24.29 | 243.33 | 92.60  |
| 1-Octen-3-ol                  | 0.01 |       |       |        |       |        |        |
| Phenylethyl Alcohol           | 0.03 | 0.18  | 7.05  | 14.69  | 40.39 | 105.83 | 93.27  |
| 3-(methylthio)-1-Propanol     |      |       |       |        | 0.49  | 1.07   | 0.74   |
| 2-Chloroethanol               |      |       |       |        |       | 4.52   |        |
| ester                         |      |       |       |        |       |        |        |
| Formic acid ethyl ester       |      |       |       |        |       | 0.42   |        |
| Butanoic acid ethyl ester     |      |       | 0.10  |        | 0.25  | 0.30   | 0.36   |
| Pentanoic acid ethyl ester    |      |       | 0.08  |        | 0.19  | 0.40   | 0.51   |
| Hexanoic acid ethyl ester     | 0.01 | 0.19  | 1.74  | 0.91   | 5.73  | 11.32  | 14.17  |
| Heptanoic acid ethyl ester    |      |       | 0.11  |        | 0.58  | 0.77   | 1.16   |
| Octanoic acid ethyl ester     |      | 0.13  | 1.01  | 0.61   | 7.62  | 10.67  | 12.91  |
| Nonanoic acid ethyl ester     |      |       | 0.25  | 0.17   | 2.37  | 2.80   | 3.48   |

|                                       |      |      |       |       |       |       |       |
|---------------------------------------|------|------|-------|-------|-------|-------|-------|
| Decanoic acid ethyl ester             | 0.47 | 1.52 | 2.01  | 15.84 | 17.66 | 23.04 |       |
| 2-hydroxy-Propanoic acid ethyl ester  | 0.05 | 0.05 | 0.42  | 0.36  | 2.57  | 1.32  |       |
| Undecanoic acid ethyl ester           |      |      | 0.36  |       |       |       |       |
| Pentadecanoic acid ethyl ester        |      |      |       | 3.80  |       |       |       |
| Dodecanoic acid ethyl ester           |      | 0.48 | 1.07  | 5.18  | 5.30  | 6.13  |       |
| Tetradecanoic acid ethyl ester        |      | 0.19 |       | 2.13  | 2.01  | 1.96  |       |
| Hexadecanoic acid ethyl ester         | 0.17 | 3.99 | 14.96 | 48.57 | 50.78 | 81.02 |       |
| Ethyl 9-hexadecenoate                 |      |      |       | 0.93  |       | 1.34  |       |
| Octadecanoic acid ethyl ester         |      |      |       | 1.29  |       | 5.30  |       |
| (E)-9-Octadecenoic acid ethyl ester   | 0.27 | 1.19 | 2.08  | 6.80  | 15.49 | 17.49 | 38.54 |
| 9,12-Octadecadienoic acid ethyl ester | 0.04 | 0.67 | 1.79  | 6.76  | 10.95 | 12.60 | 29.47 |
| Eicosanoic acid ethyl ester           | 0.01 |      | 0.08  | 0.34  |       | 1.03  |       |
| Benzoic acid ethyl ester              |      | 0.29 | 1.06  | 3.39  | 4.95  | 9.63  |       |
| Benzeneacetic acid ethyl ester        |      |      |       |       | 0.21  |       |       |
| Butanedioic acid diethyl ester        |      |      | 0.14  | 0.36  | 1.42  | 2.30  |       |
| Octanoic acid 3-methylbutyl ester     |      |      |       | 0.79  |       |       |       |
| 3-methyl-1-Butanol acetate            | 0.02 | 0.21 | 0.59  | 0.19  | 0.91  | 2.07  | 2.23  |
| Isopentyl hexanoate                   |      |      |       | 0.38  | 0.52  |       |       |
| Amyl Nitrite                          |      | 0.55 | 1.91  |       |       | 5.89  |       |
| Acetic acid phenylethyl ester         | 0.12 | 0.06 |       | 0.42  | 0.90  | 1.23  |       |



|                           |      |      |      |      |      |       |       |      |
|---------------------------|------|------|------|------|------|-------|-------|------|
| acid                      |      |      |      |      |      |       |       |      |
| Acetic acid               | 0.10 |      | 3.20 | 8.18 |      |       | 22.13 |      |
| Hexanoic acid             | 0.16 |      |      |      | 2.00 |       | 5.04  |      |
| 2-methyl-Propanoic acid   | 0.07 |      |      |      |      |       |       |      |
| 3-methyl-Butanoic acid    | 0.14 | 0.57 |      |      |      |       |       |      |
| hydroxy-Acetic acid       |      |      |      |      |      |       | 0.44  |      |
| phenol                    |      |      |      |      |      |       |       |      |
| Phenol                    | 0.02 |      |      |      |      |       | 1.74  |      |
| 2-methoxy-Phenol          | 0.06 | 0.13 | 0.09 |      | 0.89 | 1.49  | 2.46  |      |
| 4-ethyl-2-methoxy-Phenol  | 0.09 | 0.27 | 0.24 | 0.30 | 1.17 | 5.85  | 7.25  |      |
| 2-Methoxy-4-vinylphenol   | 0.20 | 0.83 | 0.86 | 1.43 | 6.65 | 10.43 | 14.05 |      |
| other                     |      |      |      |      |      |       |       |      |
| Benzothiazole             | 0.05 | 6.42 | 1.47 | 4.40 | 2.89 | 7.85  | 6.27  |      |
| 2,3-dihydro-Benzofuran    | 0.01 |      |      |      |      |       |       |      |
| 2-hydroxy-N,3,3-trimethyl |      |      |      |      |      |       |       |      |
| -Butanamide               |      | 0.07 |      |      |      |       |       |      |
| 2-Methoxyethyl ether      |      | 0.09 |      |      |      |       |       |      |
| Acetamide                 |      | 0.07 |      |      |      |       |       |      |
| N-(2-methylpropyl)-Aceta  |      |      |      |      |      |       |       |      |
| mide,                     |      |      |      |      |      |       | 0.70  | 0.27 |
| Methylamine               |      |      |      |      |      |       | 0.13  |      |
| Vinylfuran                |      |      |      |      |      |       |       | 1.03 |

| b                                                                       |                        |       |       |       |       |       |        |       |
|-------------------------------------------------------------------------|------------------------|-------|-------|-------|-------|-------|--------|-------|
| Relative content of volatile compounds in JB3 fermentation stages(mg/l) |                        |       |       |       |       |       |        |       |
| No.                                                                     | Compounds              | Day 0 | Day 2 | Day 4 | Day 6 | Day 8 | Day 10 | Day12 |
| alkane                                                                  |                        |       |       |       |       |       |        |       |
|                                                                         | Heneicosane            | 0.12  |       | 0.55  |       |       |        |       |
|                                                                         | Pentacosane            |       | 2.09  | 0.97  |       |       |        |       |
|                                                                         | 2,4,4-trimethyl-Hexane |       |       |       |       |       |        | 0.42  |
|                                                                         | 3,7-dimethylnonane     | 0.02  |       | 0.04  |       | 0.40  |        | 0.79  |
|                                                                         | 3,7-dimethyldecane     |       |       |       |       |       |        | 0.28  |

|                                                  |      |       |       |       |       |        |       |
|--------------------------------------------------|------|-------|-------|-------|-------|--------|-------|
| 3-methylundecane                                 | 0.03 |       |       |       |       |        |       |
| 3,8-dimethyundecane,                             | 0.03 |       |       |       |       |        |       |
| 6-methyl- Tridecane                              |      |       | 0.17  |       |       |        |       |
| 3,4,5,6-tetramethyloctane                        | 0.05 |       |       |       |       |        |       |
| 2,6,10,15-tetramethyl-Heptadecane                | 0.40 | 0.17  |       |       |       |        |       |
| cis-1-ethyl-3-methyl-Cyclopentane                | 0.01 |       |       |       |       |        |       |
| 2,2'-oxybis-Pentane                              | 0.01 |       |       |       |       |        |       |
| 2-(1-hydroxy-2-propyl)-1,3-dimethyl-Cyclopentane |      |       |       | 0.09  |       |        |       |
| ethoxymethyl-Oxirane                             |      |       |       | 0.07  |       |        |       |
| 1-(1-methylpropoxy)-Butane                       |      |       |       |       | 0.29  |        |       |
| 1-iodo-Decane                                    |      |       |       |       | 0.30  |        |       |
| alcohol                                          |      |       |       |       |       |        |       |
| 1-Propanol                                       | 1.23 | 0.67  | 1.29  | 1.49  | 2.56  | 3.00   |       |
| 1-Butanol                                        | 0.06 | 0.05  | 0.10  | 0.11  | 0.29  | 0.25   |       |
| 2-methyl-1-Propanol                              | 3.90 | 2.45  | 5.11  | 6.74  | 13.83 | 13.40  |       |
| 1-Pentanol                                       | 0.01 |       |       |       |       |        |       |
| 3-methyl-1-Butanol                               | 0.21 | 21.76 | 16.56 | 35.04 | 50.89 | 107.59 | 96.68 |
| 1-Hexanol                                        | 0.05 | 0.15  | 0.13  | 0.24  | 0.44  | 1.06   | 0.81  |
| Heptanol                                         | 0.02 |       |       | 0.07  |       |        |       |
| 1-Octanol                                        |      | 0.13  | 0.08  | 0.19  | 0.49  | 0.28   |       |
| 1-Nonanol                                        |      |       |       | 0.35  |       |        |       |
| 1-Undecanol                                      |      | 0.09  | 0.17  |       | 0.72  |        |       |
| 2-ethyl-1-Hexanol                                | 0.02 |       |       |       |       |        |       |
| 4-methyl-3-Hexanol                               |      | 0.14  |       |       | 0.58  | 0.69   |       |
| 2-butyl-1-Octanol                                |      |       |       |       | 0.35  |        |       |
| 6-methyl-1-Heptanol                              |      |       |       | 0.17  |       |        |       |
| 2,3-dimethyl-1-Pentanol                          |      | 0.01  |       |       |       |        |       |
| 3-ethoxy-1-Propanol                              | 0.08 |       |       |       |       |        |       |
| 1-(1-methylethoxy)-2-Prop                        |      |       | 0.85  |       |       |        |       |





|                                          |      |      |      |      |      |       |       |
|------------------------------------------|------|------|------|------|------|-------|-------|
| ester                                    |      |      |      |      |      |       |       |
| Hexadecanoic acid ethyl ester            | 1.95 | 2.86 | 3.71 | 5.02 | 9.87 | 24.11 | 17.12 |
| Octadecanoic acid ethyl ester            | 0.03 |      |      |      |      |       |       |
| (E)-9-Octadecenoic acid ethyl ester      | 0.76 | 1.38 | 1.65 | 2.34 | 2.95 | 10.12 | 7.38  |
| 9,12-Octadecadienoic acid ethyl ester    |      | 0.71 |      | 0.74 | 1.57 | 5.83  | 4.81  |
| Eicosanoic acid, ethyl ester             |      |      |      |      |      | 0.53  |       |
| 2-methyl-Butanoic acid ethyl ester       |      |      |      | 0.08 | 0.28 | 0.27  |       |
| 3-methyl-Butanoic acid ethyl ester       |      |      |      | 0.10 |      |       |       |
| Butanedioic acid diethyl ester           |      |      |      | 0.08 | 0.29 | 1.22  | 1.21  |
| 3-methyl-1-Butanol acetate               |      | 0.34 | 0.38 | 0.59 | 0.90 | 2.00  |       |
| Acetic acid methylpropyl ester           |      |      |      | 0.07 |      |       |       |
| Acetic acid phenylethyl ester            |      | 0.09 | 0.09 | 0.06 | 0.39 | 0.98  | 0.60  |
| Isopentyl hexanoate                      |      |      |      |      | 0.24 |       |       |
| Amyl Nitrite                             |      |      |      |      | 1.38 | 2.36  | 2.34  |
| Formic acid heptyl ester                 |      |      |      |      |      |       | 0.49  |
| Sulfurous acid butyl decyl ester         |      | 0.12 | 0.14 |      |      | 1.00  |       |
| Sulfurous acid hexyl octyl ester         | 0.01 |      |      |      |      |       |       |
| Sulfurous acid ethylhexyl isohexyl ester |      |      |      | 0.17 |      |       |       |
| Oxalic acid-6-ethyloct-3-yl heptyl ester |      |      |      | 0.52 |      |       |       |
| Pentafluoropropionic acid                |      | 0.07 |      |      |      |       |       |

|                                                        |      |      |      |       |       |      |
|--------------------------------------------------------|------|------|------|-------|-------|------|
| undecenyl ester                                        |      |      |      |       |       |      |
| 1,2-Benzenedicarboxylic acid bis(2-methylpropyl) ester | 0.07 |      |      | 3.08  |       |      |
| aldehyde                                               |      |      |      |       |       |      |
| Nonanal                                                | 0.02 | 0.23 |      | 0.24  | 0.48  |      |
| 2-methyl-Pentanal                                      |      | 0.06 |      |       |       |      |
| 3-methyl-Hexanal                                       |      | 0.05 |      |       | 0.49  |      |
| Hydroxy Acetaldehyde                                   | 0.03 |      |      |       |       |      |
| Methoxy Acetaldehyde                                   | 0.03 |      |      |       |       |      |
| 4-methyl-Benzaldehyde                                  |      | 0.07 |      | 0.28  |       | 0.54 |
| ketone                                                 |      |      |      |       |       |      |
| 2-Octanone                                             | 1.14 |      | 1.18 | 12.42 | 29.78 | 6.56 |
| 3-hydroxy-2-Butanone                                   | 0.56 | 0.14 | 0.09 | 0.08  |       |      |
| 5-hydroxy-2-Pentanone                                  |      |      |      |       | 0.48  |      |
| 4-Hydroxy-3-hexanone                                   | 0.19 |      |      |       |       |      |
| 1,3-dihydroxy-2-Propanone                              | 0.04 |      |      |       |       |      |
| 3,5-dimethyl-4H-Pyran-4-one                            | 0.01 |      |      |       |       |      |
| 5-ethylidihydro-2(3H)-Furanone                         | 0.01 | 0.06 |      |       |       |      |
| 5-hexyldihydro-2(3H)-Furanone                          |      |      |      |       | 1.49  |      |
| dihydro-5-propyl-2(3H)-Furanone                        |      | 0.09 | 0.08 | 0.61  |       | 1.29 |
| acid                                                   |      |      |      |       |       |      |
| Acetic acid                                            |      | 3.47 | 1.45 | 2.72  |       |      |
| Hexanoic acid                                          | 0.1  |      | 0.51 |       |       |      |
| 2-methyl-Propanoic acid                                | 0.08 | 0.64 |      | 0.37  |       |      |
| 3-methyl- Butanoic acid                                |      | 0.77 |      |       |       |      |
| phenol                                                 |      |      |      |       |       |      |
| Phenol                                                 | 0.04 |      |      |       |       |      |

|                              |      |      |      |      |       |       |       |
|------------------------------|------|------|------|------|-------|-------|-------|
| 2-methoxy-Phenol             | 0.04 |      |      |      |       | 0.66  |       |
| 4-ethyl-2-methoxy-Phenol     | 0.53 | 1.22 | 0.49 | 1.16 | 6.01  | 15.12 | 10.11 |
| 2-Methoxy-4-vinylphenol      | 1.11 | 2.36 | 1.87 | 2.26 | 10.20 | 27.61 | 22.35 |
| other                        |      |      |      |      |       |       |       |
| 2,3-dihydro- Benzofuran      | 0.07 |      |      |      |       | 0.88  |       |
| methoxy-phenyl-Oxime         | 0.02 |      |      |      |       |       |       |
| Benzothiazole                | 0.17 | 4.96 | 0.97 | 7.40 | 1.74  | 7.36  | 3.75  |
| 2-(2-butoxyethoxy)-Ethanol   |      | 0.08 |      |      |       |       |       |
| Acetamide                    |      |      | 0.04 |      |       |       |       |
| (E)-5-Decene                 |      |      |      | 0.09 |       |       |       |
| N-(2-methylpropyl)-Acetamide |      |      |      |      | 0.11  | 0.82  | 0.23  |
| Phenanthrene                 |      |      |      |      | 2.55  |       |       |
| 1,3,5,7-Cyclooctatetraene    |      |      |      |      |       | 0.31  |       |
| 9-methylene-9H-Fluorene      |      |      |      |      |       |       | 2.22  |

Table S4. Comparisons of alpha diversity indice among the two kinds of sorghum.

| Estimators              | shannon   | simpson  |
|-------------------------|-----------|----------|
| Pvalue(JB3_D0-JB3_D10)  | 0.008879  | 0.104    |
| Pvalue(JB3_D0-JB3_D12)  | 0.01504   | 0.009197 |
| Pvalue(JB3_D0-JB3_D2)   | 0.1906    | 0.5166   |
| Pvalue(JB3_D0-JB3_D4)   | 0.0008832 | 0.005293 |
| Pvalue(JB3_D0-JB3_D6)   | 0.003188  | 0.001154 |
| Pvalue(JB3_D0-JB3_D8)   | 0.001705  | 0.000384 |
| Pvalue(JB3_D0-JZ22_D0)  | 0.1258    | 0.2563   |
| Pvalue(JB3_D0-JZ22_D10) | 0.04263   | 0.03221  |
| Pvalue(JB3_D0-JZ22_D12) | 0.01823   | 0.007066 |
| Pvalue(JB3_D0-JZ22_D2)  | 0.9167    | 0.363    |
| Pvalue(JB3_D0-JZ22_D4)  | 0.001686  | 0.001699 |
| Pvalue(JB3_D0-JZ22_D6)  | 0.001731  | 0.002269 |
| Pvalue(JB3_D0-JZ22_D8)  | 0.02023   | 0.001444 |
| Pvalue(JB3_D10-JB3_D12) | 0.8957    | 0.6109   |

|                          |          |          |
|--------------------------|----------|----------|
| Pvalue(JB3_D10-JB3_D2)   | 0.9931   | 0.8698   |
| Pvalue(JB3_D10-JB3_D4)   | 0.01753  | 0.06244  |
| Pvalue(JB3_D10-JB3_D6)   | 0.4479   | 0.2676   |
| Pvalue(JB3_D10-JB3_D8)   | 0.04505  | 0.08367  |
| Pvalue(JB3_D10-JZ22_D0)  | 0.2831   | 0.6782   |
| Pvalue(JB3_D10-JZ22_D10) | 0.106    | 0.3669   |
| Pvalue(JB3_D10-JZ22_D12) | 0.7653   | 0.6041   |
| Pvalue(JB3_D10-JZ22_D2)  | 0.1218   | 0.1436   |
| Pvalue(JB3_D10-JZ22_D4)  | 0.08265  | 0.1586   |
| Pvalue(JB3_D10-JZ22_D6)  | 0.05594  | 0.1226   |
| Pvalue(JB3_D10-JZ22_D8)  | 0.6279   | 0.5643   |
| Pvalue(JB3_D12-JB3_D2)   | 0.9752   | 0.7219   |
| Pvalue(JB3_D12-JB3_D4)   | 0.004092 | 0.06039  |
| Pvalue(JB3_D12-JB3_D6)   | 0.1916   | 0.1352   |
| Pvalue(JB3_D12-JB3_D8)   | 0.006498 | 0.02438  |
| Pvalue(JB3_D12-JZ22_D0)  | 0.2942   | 0.4054   |
| Pvalue(JB3_D12-JZ22_D10) | 0.001308 | 0.002487 |
| Pvalue(JB3_D12-JZ22_D12) | 0.4448   | 0.8701   |
| Pvalue(JB3_D12-JZ22_D2)  | 0.1403   | 0.1328   |
| Pvalue(JB3_D12-JZ22_D4)  | 0.02186  | 0.08225  |
| Pvalue(JB3_D12-JZ22_D6)  | 0.009841 | 0.07162  |
| Pvalue(JB3_D12-JZ22_D8)  | 0.1458   | 0.7632   |
| Pvalue(JB3_D2-JB3_D4)    | 0.2435   | 0.3012   |
| Pvalue(JB3_D2-JB3_D6)    | 0.7859   | 0.5374   |
| Pvalue(JB3_D2-JB3_D8)    | 0.3682   | 0.3329   |
| Pvalue(JB3_D2-JZ22_D0)   | 0.5595   | 0.9541   |
| Pvalue(JB3_D2-JZ22_D10)  | 0.5048   | 0.8416   |
| Pvalue(JB3_D2-JZ22_D12)  | 0.9344   | 0.719    |
| Pvalue(JB3_D2-JZ22_D2)   | 0.2252   | 0.244    |
| Pvalue(JB3_D2-JZ22_D4)   | 0.4739   | 0.4411   |
| Pvalue(JB3_D2-JZ22_D6)   | 0.4057   | 0.3989   |
| Pvalue(JB3_D2-JZ22_D8)   | 0.8871   | 0.7006   |
| Pvalue(JB3_D4-JB3_D6)    | 0.005878 | 0.1082   |

|                           |          |           |
|---------------------------|----------|-----------|
| Pvalue(JB3_D4-JB3_D8)     | 0.08525  | 0.723     |
| Pvalue(JB3_D4-JZ22_D0)    | 0.03221  | 0.0672    |
| Pvalue(JB3_D4-JZ22_D10)   | 0.001032 | 0.0216    |
| Pvalue(JB3_D4-JZ22_D12)   | 0.00591  | 0.05959   |
| Pvalue(JB3_D4-JZ22_D2)    | 0.0397   | 0.06368   |
| Pvalue(JB3_D4-JZ22_D4)    | 0.02977  | 0.2431    |
| Pvalue(JB3_D4-JZ22_D6)    | 0.0524   | 0.3782    |
| Pvalue(JB3_D4-JZ22_D8)    | 0.006079 | 0.049     |
| Pvalue(JB3_D6-JB3_D8)     | 0.02472  | 0.05254   |
| Pvalue(JB3_D6-JZ22_D0)    | 0.1591   | 0.2133    |
| Pvalue(JB3_D6-JZ22_D10)   | 0.01594  | 0.01471   |
| Pvalue(JB3_D6-JZ22_D12)   | 0.1536   | 0.1342    |
| Pvalue(JB3_D6-JZ22_D2)    | 0.09773  | 0.103     |
| Pvalue(JB3_D6-JZ22_D4)    | 0.0851   | 0.3765    |
| Pvalue(JB3_D6-JZ22_D6)    | 0.03791  | 0.2368    |
| Pvalue(JB3_D6-JZ22_D8)    | 0.1202   | 0.1629    |
| Pvalue(JB3_D8-JZ22_D0)    | 0.05376  | 0.08993   |
| Pvalue(JB3_D8-JZ22_D10)   | 0.00114  | 0.005739  |
| Pvalue(JB3_D8-JZ22_D12)   | 0.009003 | 0.02177   |
| Pvalue(JB3_D8-JZ22_D2)    | 0.05416  | 0.07402   |
| Pvalue(JB3_D8-JZ22_D4)    | 0.2741   | 0.2267    |
| Pvalue(JB3_D8-JZ22_D6)    | 0.625    | 0.4378    |
| Pvalue(JB3_D8-JZ22_D8)    | 0.009011 | 0.01034   |
| Pvalue(JZ22_D0-JZ22_D10)  | 0.8961   | 0.7635    |
| Pvalue(JZ22_D0-JZ22_D12)  | 0.3261   | 0.4016    |
| Pvalue(JZ22_D0-JZ22_D2)   | 0.3042   | 0.1825    |
| Pvalue(JZ22_D0-JZ22_D4)   | 0.071    | 0.1432    |
| Pvalue(JZ22_D0-JZ22_D6)   | 0.05979  | 0.1173    |
| Pvalue(JZ22_D0-JZ22_D8)   | 0.3681   | 0.3785    |
| Pvalue(JZ22_D10-JZ22_D12) | 0.003283 | 0.0001959 |
| Pvalue(JZ22_D10-JZ22_D2)  | 0.3104   | 0.2184    |
| Pvalue(JZ22_D10-JZ22_D4)  | 0.00384  | 0.01625   |
| Pvalue(JZ22_D10-JZ22_D6)  | 0.001708 | 0.01737   |

|                          |          |         |
|--------------------------|----------|---------|
| Pvalue(JZ22_D10-JZ22_D8) | 0.005956 | 0.01487 |
| Pvalue(JZ22_D12-JZ22_D2) | 0.1484   | 0.1323  |
| Pvalue(JZ22_D12-JZ22_D4) | 0.02384  | 0.08049 |
| Pvalue(JZ22_D12-JZ22_D6) | 0.0125   | 0.07012 |
| Pvalue(JZ22_D12-JZ22_D8) | 0.2049   | 0.7963  |
| Pvalue(JZ22_D2-JZ22_D4)  | 0.06363  | 0.08807 |
| Pvalue(JZ22_D2-JZ22_D6)  | 0.05772  | 0.08119 |
| Pvalue(JZ22_D2-JZ22_D8)  | 0.1582   | 0.1279  |
| Pvalue(JZ22_D4-JZ22_D6)  | 0.489    | 0.6832  |
| Pvalue(JZ22_D4-JZ22_D8)  | 0.02202  | 0.07227 |
| Pvalue(JZ22_D6-JZ22_D8)  | 0.01215  | 0.05853 |

Table S5. Bacterial genera abundance during different fermentation stages of JZ22 and JB3.

| OTU ID                                   | JZ22<br>D0 | JZ22<br>D2 | JZ22<br>D4 | JZ22<br>D6 | JZ22<br>D8 | JZ22<br>D10 | JZ22<br>D12 | JB3<br>D0 | JB3<br>D2 | JB3<br>D4 | JB3<br>D6 | JB3<br>D8 | JB3<br>D10 | JB3<br>D12 |
|------------------------------------------|------------|------------|------------|------------|------------|-------------|-------------|-----------|-----------|-----------|-----------|-----------|------------|------------|
| g__[Eubacterium]_coprostanoligenes_group | 0          | 0          | 0          | 0          | 0          | 0           | 0           | 0         | 0         | 0         | 2         | 1         | 0          | 0          |
| g__[Eubacterium]_eligens_group           | 0          | 0          | 0          | 0          | 0          | 1           | 0           | 0         | 0         | 1         | 0         | 0         | 0          | 1          |
| g__[Eubacterium]_hallii_group            | 1          | 0          | 0          | 0          | 1          | 1           | 0           | 0         | 0         | 1         | 1         | 2         | 0          | 2          |
| g__[Eubacterium]_rectale_group           | 0          | 0          | 2          | 1          | 1          | 5           | 6           | 0         | 0         | 5         | 1         | 3         | 4          | 9          |
| g__[Eubacterium]_ruminantium_group       | 0          | 0          | 0          | 0          | 0          | 0           | 1           | 0         | 0         | 0         | 0         | 0         | 0          | 0          |
| g__[Eubacterium]_ventriosum_group        | 0          | 0          | 0          | 0          | 0          | 0           | 0           | 0         | 0         | 0         | 0         | 2         | 0          | 0          |
| g__[Ruminococcus]_torques_group          | 0          | 0          | 0          | 0          | 1          | 1           | 2           | 0         | 0         | 0         | 0         | 5         | 3          | 1          |
| g__Acetobacter                           | 16         | 4          | 11         | 10         | 5          | 1           | 5           | 2         | 15        | 3         | 4         | 8         | 3          | 3          |
| g__Achromobacter                         | 1          | 0          | 3          | 4          | 4          | 7           | 3           | 0         | 1         | 7         | 5         | 7         | 5          | 7          |
| g__Acidibacter                           | 0          | 0          | 0          | 0          | 0          | 0           | 0           | 0         | 0         | 1         | 0         | 0         | 0          | 0          |
| g__Acinetobacter                         | 4          | 1          | 17         | 6          | 6          | 10          | 68          | 5         | 4         | 11        | 7         | 15        | 9          | 9          |
| g__Alistipes                             | 0          | 0          | 0          | 0          | 0          | 0           | 0           | 0         | 0         | 0         | 1         | 0         | 1          | 0          |
| g__Alloprevotella                        | 0          | 0          | 0          | 0          | 0          | 0           | 0           | 0         | 0         | 1         | 0         | 0         | 0          | 0          |
| g__Anaerococcus                          | 0          | 0          | 0          | 0          | 0          | 0           | 0           | 0         | 0         | 1         | 0         | 0         | 0          | 1          |
| g__Anaerostipes                          | 0          | 0          | 0          | 0          | 1          | 1           | 3           | 1         | 0         | 3         | 1         | 2         | 1          | 3          |
| g__Apibacter                             | 15         | 19         | 49         | 91         | 14         | 11          | 4           | 7         | 42        | 64        | 31        | 37        | 10         | 7          |
| g__Aquabacterium                         | 3          | 1          | 7          | 4          | 5          | 7           | 7           | 1         | 2         | 10        | 5         | 8         | 8          | 7          |

|                                  |       |       |       |       |       |       |       |       |       |       |       |       |       |       |
|----------------------------------|-------|-------|-------|-------|-------|-------|-------|-------|-------|-------|-------|-------|-------|-------|
| g__Atopobium                     | 0     | 0     | 0     | 0     | 0     | 0     | 22    | 0     | 0     | 0     | 0     | 0     | 0     | 0     |
| g__Azospirillum                  | 0     | 0     | 1     | 0     | 0     | 0     | 0     | 0     | 0     | 0     | 0     | 0     | 0     | 0     |
| g__Bacillus                      | 37925 | 36148 | 33308 | 34736 | 37303 | 37942 | 37252 | 38918 | 33378 | 32132 | 33412 | 31541 | 35042 | 35857 |
| g__Bacteroides                   | 3     | 1     | 1     | 3     | 4     | 4     | 5     | 1     | 5     | 3     | 2     | 3     | 3     | 4     |
| g__Bdellovibrio                  | 0     | 0     | 0     | 1     | 1     | 1     | 0     | 0     | 1     | 0     | 1     | 1     | 2     | 3     |
| g__Bifidobacterium               | 0     | 2     | 1     | 3     | 3     | 8     | 11    | 0     | 3     | 15    | 5     | 13    | 10    | 17    |
| g__Bilophila                     | 0     | 0     | 0     | 0     | 0     | 0     | 0     | 0     | 0     | 0     | 0     | 0     | 0     | 0     |
| g__Blautia                       | 1     | 1     | 2     | 2     | 3     | 8     | 11    | 1     | 2     | 9     | 4     | 16    | 8     | 14    |
| g__Bradyrhizobium                | 0     | 0     | 1     | 1     | 1     | 1     | 2     | 1     | 1     | 2     | 1     | 2     | 1     | 1     |
| g__Brevibacillus                 | 1     | 0     | 1     | 88    | 32    | 7     | 1     | 38    | 78    | 972   | 3488  | 4400  | 1936  | 2080  |
| g__Brevundimonas                 | 1     | 1     | 3     | 1     | 0     | 0     | 0     | 0     | 1     | 2     | 0     | 1     | 0     | 0     |
| g__Burkholderia-Paraburkholderia | 1     | 1     | 13    | 18    | 12    | 15    | 9     | 2     | 4     | 7     | 10    | 17    | 9     | 12    |
| g__Carnimonas                    | 1     | 0     | 0     | 1     | 0     | 0     | 0     | 1     | 0     | 0     | 1     | 0     | 0     | 0     |
| g__Catenibacterium               | 0     | 0     | 0     | 0     | 0     | 0     | 0     | 0     | 0     | 0     | 0     | 0     | 1     | 0     |
| g__Cellulosimicrobium            | 0     | 0     | 0     | 0     | 0     | 0     | 0     | 0     | 0     | 0     | 0     | 0     | 0     | 1     |
| g__Cetobacterium                 | 0     | 0     | 0     | 0     | 0     | 0     | 0     | 0     | 0     | 1     | 0     | 0     | 1     | 0     |
| g__Chroococcidiopsis             | 0     | 0     | 0     | 0     | 11    | 0     | 0     | 0     | 0     | 0     | 0     | 0     | 0     | 0     |
| g__Chryseobacterium              | 0     | 0     | 0     | 0     | 0     | 1     | 9     | 0     | 0     | 0     | 0     | 0     | 0     | 0     |
| g__Cloacibacterium               | 0     | 0     | 0     | 0     | 0     | 0     | 2     | 0     | 0     | 1     | 0     | 0     | 0     | 0     |
| g__Clostridium_sensu_stricto_1   | 0     | 1     | 1     | 1     | 1     | 1     | 0     | 0     | 0     | 7     | 2     | 2     | 4     | 2     |
| g__Clostridium_sensu_stricto_10  | 0     | 0     | 0     | 0     | 0     | 0     | 0     | 0     | 0     | 0     | 1     | 0     | 0     | 0     |
| g__Clostridium_sensu_stricto_13  | 0     | 0     | 0     | 0     | 0     | 0     | 0     | 0     | 0     | 0     | 0     | 0     | 0     | 0     |
| g__Collinsella                   | 0     | 1     | 1     | 0     | 1     | 5     | 6     | 0     | 1     | 2     | 2     | 7     | 2     | 5     |
| g__Coprococcus_1                 | 0     | 0     | 0     | 0     | 0     | 0     | 0     | 0     | 0     | 1     | 0     | 1     | 0     | 1     |
| g__Coprococcus_3                 | 1     | 0     | 0     | 0     | 1     | 1     | 1     | 0     | 0     | 0     | 0     | 1     | 0     | 1     |
| g__Corynebacterium_1             | 1     | 2     | 7     | 4     | 4     | 3     | 5     | 1     | 1     | 4     | 6     | 4     | 2     | 5     |
| g__Cupriavidus                   | 0     | 0     | 0     | 0     | 0     | 1     | 0     | 0     | 0     | 2     | 0     | 2     | 1     | 1     |
| g__Deinococcus                   | 0     | 0     | 0     | 0     | 3     | 0     | 0     | 0     | 0     | 0     | 0     | 0     | 1     | 0     |
| g__Desulfovibrio                 | 1     | 1     | 0     | 0     | 0     | 0     | 0     | 0     | 0     | 1     | 0     | 0     | 0     | 0     |
| g__Dialister                     | 0     | 0     | 0     | 1     | 0     | 0     | 4     | 0     | 0     | 1     | 1     | 0     | 0     | 2     |
| g__Dorea                         | 0     | 1     | 0     | 1     | 1     | 2     | 1     | 0     | 0     | 2     | 1     | 3     | 1     | 0     |
| g__Enhydrobacter                 | 0     | 0     | 0     | 1     | 0     | 3     | 0     | 0     | 0     | 0     | 0     | 0     | 0     | 5     |
| g__Enterococcus                  | 1     | 1     | 3     | 1     | 0     | 0     | 3     | 0     | 1     | 0     | 1     | 0     | 1     | 1     |





|                                      |     |     |      |     |     |     |     |     |      |      |      |      |      |     |
|--------------------------------------|-----|-----|------|-----|-----|-----|-----|-----|------|------|------|------|------|-----|
| g_norank_c_BD7-11                    | 0   | 0   | 1    | 1   | 3   | 2   | 3   | 0   | 0    | 2    | 2    | 3    | 2    | 2   |
| g_norank_c_Cyanobacteria             | 357 | 753 | 1042 | 924 | 674 | 344 | 272 | 132 | 2378 | 2728 | 1331 | 1173 | 1096 | 695 |
| g_norank_c_Gemmatimonadetes          | 0   | 2   | 0    | 0   | 0   | 1   | 0   | 0   | 0    | 0    | 0    | 0    | 0    | 0   |
| g_norank_f_0319-6G20                 | 0   | 0   | 1    | 1   | 1   | 2   | 1   | 0   | 1    | 0    | 1    | 2    | 2    | 2   |
| g_norank_f_Actinopolysporaceae       | 0   | 1   | 8    | 3   | 2   | 5   | 5   | 0   | 1    | 2    | 4    | 7    | 4    | 6   |
| g_norank_f_Anaerolineaceae           | 0   | 0   | 0    | 0   | 0   | 0   | 0   | 0   | 0    | 0    | 1    | 0    | 0    | 0   |
| g_norank_f_Bacteroidales_S24-7_group | 2   | 0   | 2    | 0   | 0   | 0   | 0   | 0   | 1    | 2    | 1    | 0    | 0    | 1   |
| g_norank_f_Cytophagaceae             | 0   | 0   | 0    | 0   | 0   | 0   | 1   | 0   | 0    | 0    | 0    | 0    | 0    | 0   |
| g_norank_f_Elev-16S-1332             | 0   | 0   | 0    | 0   | 0   | 0   | 0   | 1   | 0    | 0    | 0    | 0    | 0    | 0   |
| g_norank_f_env.OPS_17                | 0   | 0   | 0    | 0   | 0   | 0   | 0   | 0   | 0    | 0    | 0    | 0    | 1    | 0   |
| g_norank_f_Holophagaceae             | 0   | 0   | 0    | 0   | 1   | 0   | 0   | 0   | 0    | 0    | 1    | 0    | 0    | 1   |
| g_norank_f_Longimicrobiaceae         | 0   | 1   | 0    | 0   | 0   | 0   | 0   | 0   | 0    | 0    | 0    | 0    | 0    | 0   |
| g_norank_f_Mitochondria              | 102 | 256 | 285  | 353 | 205 | 42  | 19  | 24  | 684  | 290  | 133  | 181  | 224  | 59  |
| g_norank_f_Neisseriaceae             | 0   | 0   | 1    | 0   | 0   | 0   | 0   | 0   | 0    | 0    | 1    | 1    | 0    | 0   |
| g_norank_f_Nitrosomonadaceae         | 0   | 0   | 0    | 0   | 1   | 0   | 0   | 0   | 0    | 0    | 0    | 0    | 0    | 0   |
| g_norank_f_Porphyrimonadaceae        | 0   | 0   | 0    | 1   | 0   | 0   | 0   | 0   | 0    | 0    | 0    | 0    | 0    | 0   |
| g_norank_f_Ruminococcaceae           | 0   | 0   | 0    | 0   | 0   | 0   | 0   | 0   | 0    | 0    | 1    | 1    | 1    | 1   |
| g_norank_f_Synergistaceae            | 0   | 0   | 0    | 0   | 0   | 0   | 1   | 0   | 0    | 0    | 0    | 0    | 0    | 0   |
| g_norank_f_Syntrophaceae             | 0   | 0   | 0    | 0   | 0   | 0   | 0   | 0   | 0    | 0    | 0    | 1    | 0    | 1   |
| g_norank_f_Unknown_Family            | 0   | 0   | 1    | 1   | 0   | 0   | 0   | 0   | 0    | 0    | 0    | 0    | 0    | 0   |
| g_norank_p_Saccharibacteria          | 0   | 0   | 0    | 0   | 0   | 0   | 0   | 0   | 0    | 0    | 0    | 1    | 0    | 0   |
| g_norank_p_WWE3                      | 1   | 0   | 3    | 0   | 0   | 0   | 0   | 0   | 16   | 1    | 0    | 0    | 0    | 0   |
| g_Novosphingobium                    | 0   | 0   | 1    | 0   | 0   | 1   | 0   | 1   | 1    | 1    | 0    | 1    | 1    | 1   |
| g_Oceanobacillus                     | 0   | 3   | 1    | 1   | 1   | 0   | 0   | 0   | 0    | 1    | 0    | 4    | 0    | 0   |
| g_Paenibacillus                      | 940 | 322 | 180  | 247 | 41  | 264 | 898 | 526 | 1111 | 553  | 189  | 635  | 349  | 162 |
| g_Paeniclostridium                   | 1   | 0   | 0    | 1   | 0   | 2   | 1   | 0   | 0    | 0    | 1    | 0    | 1    | 0   |
| g_Pantoea                            | 1   | 0   | 4    | 3   | 2   | 1   | 0   | 0   | 8    | 1    | 1    | 1    | 2    | 1   |
| g_Parabacteroides                    | 0   | 0   | 0    | 0   | 0   | 0   | 1   | 0   | 0    | 0    | 0    | 1    | 0    | 0   |
| g_Paracoccus                         | 1   | 0   | 2    | 1   | 0   | 1   | 0   | 0   | 0    | 0    | 0    | 1    | 0    | 1   |
| g_Parasutterella                     | 1   | 0   | 0    | 0   | 0   | 0   | 0   | 0   | 1    | 0    | 0    | 0    | 0    | 0   |
| g_Pediococcus                        | 38  | 58  | 92   | 182 | 20  | 18  | 21  | 20  | 31   | 22   | 2    | 8    | 7    | 6   |
| g_Pelomonas                          | 3   | 1   | 1    | 6   | 6   | 7   | 3   | 2   | 2    | 14   | 4    | 6    | 6    | 9   |
| g_Perlucidibaca                      | 0   | 0   | 0    | 0   | 0   | 1   | 0   | 0   | 0    | 1    | 0    | 0    | 0    | 0   |

|                               |    |    |     |     |     |     |     |    |    |     |    |     |     |     |
|-------------------------------|----|----|-----|-----|-----|-----|-----|----|----|-----|----|-----|-----|-----|
| g_Phascolarctobacterium       | 0  | 0  | 0   | 0   | 0   | 0   | 2   | 0  | 0  | 1   | 0  | 0   | 0   | 0   |
| g_Porphyrromonas              | 0  | 0  | 0   | 0   | 0   | 0   | 2   | 0  | 0  | 0   | 0  | 0   | 0   | 0   |
| g_Prevotella                  | 0  | 0  | 0   | 0   | 0   | 0   | 70  | 0  | 0  | 2   | 0  | 0   | 0   | 0   |
| g_Prevotella_1                | 0  | 0  | 2   | 0   | 0   | 0   | 0   | 0  | 0  | 0   | 0  | 0   | 0   | 0   |
| g_Prevotella_6                | 0  | 0  | 0   | 0   | 0   | 0   | 5   | 0  | 0  | 0   | 0  | 0   | 0   | 0   |
| g_Prevotella_9                | 0  | 3  | 1   | 3   | 5   | 18  | 16  | 2  | 1  | 2   | 0  | 3   | 1   | 2   |
| g_Propionibacterium           | 0  | 1  | 2   | 4   | 2   | 1   | 3   | 0  | 0  | 2   | 1  | 1   | 1   | 4   |
| g_Pseudomonas                 | 2  | 4  | 17  | 7   | 2   | 4   | 3   | 0  | 3  | 7   | 2  | 4   | 7   | 2   |
| g_Pseudorhodofera             | 0  | 0  | 0   | 1   | 0   | 0   | 0   | 0  | 0  | 0   | 0  | 0   | 0   | 0   |
| g_Ralstonia                   | 43 | 16 | 114 | 133 | 108 | 162 | 128 | 29 | 38 | 194 | 90 | 139 | 144 | 150 |
| g_Rhizobium                   | 0  | 0  | 0   | 0   | 0   | 0   | 1   | 0  | 0  | 0   | 0  | 0   | 1   | 0   |
| g_Rhizomicrobium              | 0  | 0  | 0   | 0   | 0   | 1   | 0   | 0  | 0  | 0   | 0  | 0   | 0   | 1   |
| g_Rhodococcus                 | 38 | 13 | 93  | 128 | 81  | 123 | 127 | 35 | 29 | 199 | 78 | 140 | 81  | 163 |
| g_Rikenellaceae_RC9_gut_group | 0  | 0  | 0   | 0   | 1   | 0   | 0   | 0  | 0  | 1   | 0  | 0   | 0   | 0   |
| g_Roseburia                   | 0  | 0  | 1   | 0   | 0   | 1   | 4   | 0  | 1  | 0   | 0  | 1   | 1   | 1   |
| g_Roseomonas                  | 0  | 0  | 0   | 0   | 0   | 0   | 0   | 0  | 0  | 1   | 0  | 0   | 0   | 0   |
| g_Rubellimicrobium            | 0  | 0  | 2   | 0   | 0   | 0   | 0   | 0  | 0  | 1   | 0  | 0   | 0   | 0   |
| g_Ruminiclostridium           | 0  | 0  | 0   | 0   | 0   | 0   | 0   | 0  | 0  | 1   | 0  | 0   | 0   | 0   |
| g_Ruminococcaceae_UCG-002     | 0  | 0  | 0   | 0   | 0   | 0   | 0   | 0  | 0  | 0   | 0  | 0   | 0   | 1   |
| g_Ruminococcaceae_UCG-010     | 0  | 0  | 0   | 0   | 0   | 0   | 0   | 0  | 0  | 0   | 0  | 0   | 0   | 0   |
| g_Ruminococcus_1              | 0  | 0  | 1   | 0   | 0   | 4   | 1   | 0  | 0  | 1   | 0  | 4   | 2   | 2   |
| g_Ruminococcus_2              | 2  | 0  | 0   | 0   | 0   | 0   | 1   | 1  | 0  | 5   | 0  | 3   | 1   | 1   |
| g_Rummeliibacillus            | 6  | 28 | 5   | 6   | 2   | 6   | 5   | 8  | 44 | 65  | 31 | 75  | 25  | 10  |
| g_Saccharopolyspora           | 7  | 26 | 82  | 76  | 47  | 46  | 41  | 4  | 34 | 43  | 58 | 86  | 47  | 72  |
| g_Sediminibacterium           | 0  | 0  | 0   | 0   | 0   | 0   | 0   | 0  | 1  | 0   | 0  | 0   | 0   | 0   |
| g_Shuttleworthia              | 1  | 1  | 0   | 0   | 0   | 0   | 232 | 0  | 0  | 1   | 0  | 0   | 0   | 0   |
| g_Sneathia                    | 0  | 0  | 0   | 0   | 0   | 0   | 11  | 0  | 0  | 0   | 0  | 0   | 0   | 0   |
| g_Solibacillus                | 0  | 0  | 0   | 0   | 0   | 2   | 0   | 0  | 0  | 0   | 0  | 0   | 1   | 1   |
| g_Sorangium                   | 0  | 0  | 1   | 0   | 0   | 0   | 0   | 0  | 1  | 1   | 0  | 0   | 1   | 0   |
| g_Sphingobacterium            | 0  | 2  | 3   | 3   | 0   | 0   | 0   | 0  | 0  | 1   | 0  | 1   | 0   | 0   |
| g_Sphingomonas                | 0  | 0  | 0   | 0   | 1   | 1   | 6   | 0  | 0  | 1   | 0  | 1   | 1   | 0   |
| g_Sporosarcina                | 0  | 0  | 0   | 0   | 0   | 0   | 0   | 0  | 0  | 1   | 0  | 0   | 0   | 0   |
| g_Staphylococcus              | 8  | 38 | 86  | 123 | 22  | 16  | 11  | 6  | 76 | 15  | 7  | 8   | 5   | 5   |

|                                        |     |      |      |      |      |     |     |    |      |      |     |     |     |     |
|----------------------------------------|-----|------|------|------|------|-----|-----|----|------|------|-----|-----|-----|-----|
| g_Stenotrophomonas                     | 0   | 0    | 1    | 0    | 1    | 0   | 6   | 0  | 0    | 1    | 0   | 1   | 3   | 3   |
| g_Streptococcus                        | 1   | 0    | 0    | 3    | 0    | 0   | 10  | 0  | 1    | 4    | 0   | 1   | 0   | 4   |
| g_Streptomyces                         | 13  | 79   | 186  | 206  | 88   | 119 | 68  | 3  | 147  | 102  | 115 | 132 | 122 | 144 |
| g_Subdoligranulum                      | 0   | 0    | 0    | 0    | 0    | 1   | 2   | 0  | 1    | 5    | 3   | 6   | 4   | 6   |
| g_Sulfuritalea                         | 0   | 0    | 0    | 0    | 0    | 0   | 0   | 0  | 0    | 0    | 0   | 0   | 0   | 0   |
| g_Sva0081_sediment_group               | 0   | 0    | 0    | 0    | 0    | 0   | 0   | 1  | 0    | 0    | 0   | 0   | 0   | 0   |
| g_Terrabacter                          | 0   | 0    | 1    | 0    | 0    | 4   | 1   | 0  | 0    | 1    | 0   | 0   | 0   | 2   |
| g_Terrisporobacter                     | 0   | 0    | 0    | 0    | 0    | 0   | 0   | 0  | 0    | 1    | 0   | 0   | 0   | 0   |
| g_Thermoactinomyces                    | 0   | 0    | 1    | 0    | 0    | 1   | 0   | 0  | 0    | 1    | 2   | 2   | 1   | 0   |
| g_Thermus                              | 0   | 0    | 0    | 0    | 0    | 0   | 1   | 0  | 0    | 1    | 0   | 1   | 1   | 0   |
| g_unclassified_c_Betaproteobacteria    | 0   | 0    | 0    | 0    | 0    | 1   | 0   | 0  | 0    | 0    | 0   | 0   | 1   | 0   |
| g_unclassified_c_Gemmatimonadetes      | 0   | 0    | 1    | 0    | 0    | 0   | 0   | 0  | 0    | 0    | 0   | 0   | 0   | 0   |
| g_unclassified_f_Comamonadaceae        | 0   | 0    | 0    | 0    | 3    | 0   | 0   | 0  | 0    | 0    | 0   | 0   | 0   | 0   |
| g_unclassified_f_Corynebacteriaceae    | 0   | 0    | 1    | 1    | 0    | 0   | 1   | 0  | 0    | 1    | 0   | 0   | 1   | 0   |
| g_unclassified_f_Enterobacteriaceae    | 1   | 1    | 4    | 6    | 4    | 0   | 0   | 0  | 0    | 4    | 8   | 3   | 4   | 0   |
| g_unclassified_f_Erythrobacteraceae    | 0   | 0    | 0    | 0    | 0    | 0   | 0   | 0  | 0    | 0    | 0   | 1   | 0   | 0   |
| g_unclassified_f_Lachnospiraceae       | 0   | 0    | 0    | 0    | 0    | 0   | 2   | 0  | 1    | 1    | 0   | 2   | 1   | 0   |
| g_unclassified_f_Peptostreptococcaceae | 0   | 0    | 0    | 1    | 1    | 1   | 1   | 0  | 1    | 2    | 1   | 1   | 3   | 2   |
| g_unclassified_f_Prevotellaceae        | 0   | 0    | 0    | 1    | 0    | 0   | 1   | 0  | 0    | 0    | 0   | 0   | 0   | 0   |
| g_unclassified_k_norank                | 0   | 2    | 4    | 0    | 0    | 0   | 1   | 1  | 4    | 5    | 2   | 1   | 9   | 1   |
| g_unclassified_o_Bacillales            | 0   | 0    | 0    | 1    | 0    | 0   | 0   | 1  | 2    | 3    | 12  | 28  | 12  | 6   |
| g_unclassified_o_Rhizobiales           | 0   | 0    | 0    | 0    | 1    | 0   | 0   | 0  | 0    | 0    | 0   | 1   | 0   | 0   |
| g_unclassified_p_Firmicutes            | 0   | 0    | 0    | 0    | 0    | 0   | 0   | 0  | 0    | 0    | 0   | 0   | 0   | 1   |
| g_unclassified_p_Proteobacteria        | 10  | 4    | 26   | 3    | 6    | 8   | 1   | 1  | 19   | 13   | 16  | 6   | 21  | 8   |
| g_Undibacterium                        | 0   | 0    | 0    | 0    | 0    | 1   | 0   | 0  | 0    | 1    | 1   | 2   | 1   | 1   |
| g_Vibrio                               | 0   | 0    | 0    | 0    | 1    | 0   | 0   | 0  | 0    | 1    | 0   | 0   | 0   | 0   |
| g_Virgibacillus                        | 0   | 0    | 0    | 0    | 0    | 0   | 0   | 0  | 0    | 1    | 0   | 0   | 0   | 0   |
| g_Weissella                            | 192 | 2134 | 4073 | 2294 | 1087 | 564 | 312 | 51 | 1702 | 2154 | 743 | 933 | 495 | 187 |

Table S6. Predicted gene functions related to KEGG pathways at levels 3

|                                               | JZ22 | JZ22 | JZ22 | JZ22 | JZ22 | JZ22 | JZ22 | JZ22 | JB3 | JB3 | JB3 | JB3 | JB3 | JB3 | JB3 |
|-----------------------------------------------|------|------|------|------|------|------|------|------|-----|-----|-----|-----|-----|-----|-----|
|                                               | D0   | D2   | D4   | D6   | D8   | D10  | D12  | D12  | D0  | D2  | D4  | D6  | D8  | D10 | D12 |
| 1,1,1-Trichloro-2,2-bis(4-chlorophenyl)ethane | 34   | 13   | 89   | 113  | 83   | 128  | 112  | 112  | 28  | 30  | 173 | 74  | 121 | 100 | 137 |

|                                                        |       |       |       |       |       |       |       |       |       |       |       |       |       |       |
|--------------------------------------------------------|-------|-------|-------|-------|-------|-------|-------|-------|-------|-------|-------|-------|-------|-------|
| (DDT) degradation                                      | 67928 | 65210 | 67897 | 67926 | 68526 | 68130 | 71610 | 66753 | 72660 | 73077 | 71016 | 71265 | 70313 | 69745 |
| ABC transporters                                       | 7     | 0     | 0     | 2     | 3     | 8     | 7     | 2     | 6     | 1     | 6     | 0     | 7     | 2     |
| Adherens junction                                      | 0     | 0     | 0     | 0     | 0     | 0     | 0     | 0     | 0     | 0     | 0     | 0     | 0     | 0     |
| Adipocytokine signaling pathway                        | 10320 | 9943  | 10688 | 10885 | 10831 | 10801 | 10901 | 10001 | 11204 | 11864 | 10842 | 10808 | 10882 | 11010 |
| African trypanosomiasis                                | 123   | 259   | 315   | 389   | 235   | 80    | 86    | 38    | 697   | 422   | 442   | 592   | 413   | 286   |
|                                                        | 17446 | 17041 | 17043 | 17314 | 17755 | 17829 | 18219 | 17613 | 18621 | 18497 | 18023 | 17685 | 18033 | 17993 |
| Alanine, aspartate and glutamate metabolism            | 4     | 3     | 6     | 2     | 5     | 8     | 9     | 3     | 6     | 8     | 2     | 9     | 0     | 9     |
| Aldosterone-regulated sodium reabsorption              | 0     | 0     | 0     | 0     | 0     | 0     | 0     | 0     | 0     | 0     | 0     | 1     | 1     | 0     |
| Alzheimer's disease                                    | 10367 | 11059 | 11284 | 11665 | 10892 | 10256 | 10284 | 10001 | 13547 | 11672 | 10522 | 10517 | 10917 | 10184 |
| Amino acid metabolism                                  | 56996 | 56797 | 57012 | 57168 | 59015 | 58794 | 57525 | 58572 | 62986 | 63327 | 62583 | 61926 | 61687 | 61042 |
|                                                        | 22329 | 22657 | 23151 | 23165 | 22986 | 22613 | 23204 | 22318 | 25696 | 24950 | 23225 | 22986 | 23359 | 22781 |
| Amino acid related enzymes                             | 1     | 9     | 7     | 0     | 9     | 4     | 2     | 0     | 2     | 3     | 7     | 3     | 4     | 4     |
|                                                        | 23958 | 23437 | 23731 | 23660 | 24194 | 24319 | 25015 | 24318 | 25857 | 25023 | 24284 | 23675 | 24363 | 24147 |
| Amino sugar and nucleotide sugar metabolism            | 5     | 6     | 7     | 8     | 5     | 0     | 6     | 0     | 7     | 6     | 2     | 7     | 1     | 2     |
|                                                        | 15475 | 16435 | 17465 | 17109 | 16332 | 15644 | 16121 | 15139 | 19347 | 18844 | 16508 | 16558 | 16621 | 15847 |
| Aminoacyl-tRNA biosynthesis                            | 6     | 0     | 3     | 9     | 2     | 8     | 5     | 5     | 3     | 9     | 6     | 1     | 8     | 8     |
| Aminobenzoate degradation                              | 89724 | 85786 | 85733 | 87968 | 91638 | 93950 | 92263 | 93412 | 89300 | 91345 | 92258 | 92029 | 93290 | 95501 |
| Amoebiasis                                             | 13290 | 12536 | 11807 | 12111 | 13347 | 13725 | 13333 | 14052 | 13125 | 12009 | 12818 | 12185 | 13249 | 13317 |
| Amyotrophic lateral sclerosis (ALS)                    | 22104 | 20794 | 18887 | 19800 | 22013 | 22862 | 22112 | 23853 | 21242 | 19119 | 20988 | 20552 | 22201 | 22382 |
| Antigen processing and presentation                    | 5080  | 5085  | 4868  | 5114  | 5009  | 4967  | 5216  | 4904  | 6113  | 5560  | 5140  | 4918  | 5081  | 4919  |
| Apoptosis                                              | 170   | 697   | 1159  | 884   | 458   | 208   | 143   | 51    | 1040  | 778   | 302   | 415   | 366   | 148   |
| Arachidonic acid metabolism                            | 14484 | 14159 | 13441 | 14019 | 14751 | 14891 | 14497 | 14701 | 15180 | 14992 | 14810 | 14580 | 15102 | 15029 |
|                                                        | 24220 | 23627 | 24080 | 24239 | 24713 | 24582 | 25187 | 24156 | 26159 | 26150 | 24995 | 24635 | 25034 | 24834 |
| Arginine and proline metabolism                        | 4     | 4     | 7     | 3     | 1     | 0     | 8     | 8     | 7     | 0     | 2     | 3     | 1     | 0     |
| Arrhythmogenic right ventricular cardiomyopathy (ARVC) | 0     | 0     | 0     | 0     | 0     | 0     | 0     | 0     | 0     | 0     | 0     | 0     | 0     | 0     |
| Ascorbate and aldarate metabolism                      | 54560 | 50349 | 49574 | 50534 | 54361 | 56019 | 56159 | 56564 | 51955 | 47896 | 51468 | 49117 | 52765 | 53853 |
| Atrazine degradation                                   | 2656  | 3115  | 4442  | 4407  | 2847  | 2130  | 2769  | 892   | 4641  | 6058  | 2911  | 2736  | 2365  | 2166  |
|                                                        | 12879 | 11986 | 11313 | 11739 | 12536 | 12881 | 13750 | 13107 | 11822 | 11350 | 12458 | 12307 | 12573 | 12806 |
| Bacterial chemotaxis                                   | 0     | 1     | 6     | 6     | 7     | 7     | 6     | 2     | 0     | 1     | 1     | 9     | 1     | 3     |
| Bacterial invasion of epithelial cells                 | 181   | 366   | 512   | 448   | 341   | 170   | 145   | 134   | 1237  | 1534  | 750   | 678   | 609   | 408   |
| Bacterial motility proteins                            | 27587 | 26438 | 25472 | 26296 | 27546 | 27703 | 29198 | 27523 | 27900 | 27806 | 27943 | 27540 | 28019 | 28001 |

|                                                          |       |       |       |       |       |       |       |       |       |       |       |       |       |       |
|----------------------------------------------------------|-------|-------|-------|-------|-------|-------|-------|-------|-------|-------|-------|-------|-------|-------|
|                                                          | 2     | 1     | 0     | 6     | 3     | 1     | 2     | 1     | 5     | 2     | 8     | 1     | 6     | 1     |
| Bacterial secretion system                               | 73197 | 78532 | 82884 | 82780 | 77584 | 73420 | 75031 | 70416 | 95529 | 88801 | 76689 | 76368 | 78023 | 73334 |
| Bacterial toxins                                         | 14623 | 14618 | 15354 | 14977 | 15118 | 14993 | 15081 | 15248 | 16160 | 17367 | 16550 | 16737 | 16146 | 15990 |
| Basal transcription factors                              | 116   | 57    | 115   | 149   | 75    | 116   | 162   | 66    | 176   | 253   | 389   | 553   | 288   | 305   |
| Base excision repair                                     | 66617 | 67500 | 69144 | 69848 | 68625 | 67498 | 68996 | 65384 | 75688 | 75121 | 70358 | 71073 | 70534 | 69183 |
| Benzoate degradation                                     | 71340 | 69913 | 73739 | 75200 | 73864 | 75500 | 74986 | 71770 | 70997 | 79454 | 76041 | 78338 | 75682 | 78382 |
| Betalain biosynthesis                                    | 12    | 18    | 57    | 65    | 41    | 58    | 40    | 7     | 34    | 64    | 40    | 56    | 55    | 61    |
| Bile secretion                                           | 7     | 29    | 77    | 81    | 36    | 47    | 39    | 2     | 55    | 42    | 46    | 58    | 51    | 59    |
| Biosynthesis and biodegradation of secondary metabolites | 9751  | 10161 | 10293 | 10542 | 10220 | 10436 | 10193 | 9977  | 11442 | 12167 | 11153 | 11047 | 10816 | 10928 |
| Biosynthesis of 12-, 14- and 16-membered macrolides      | 15    | 85    | 217   | 231   | 107   | 136   | 83    | 2     | 156   | 116   | 133   | 164   | 139   | 170   |
| Biosynthesis of ansamycins                               | 13598 | 12706 | 12155 | 12498 | 13559 | 14072 | 14898 | 14301 | 13609 | 12650 | 13152 | 12802 | 13666 | 13786 |
| Biosynthesis of siderophore group nonribosomal peptides  | 29198 | 28082 | 24021 | 25701 | 28763 | 30823 | 28755 | 33226 | 29093 | 27265 | 29330 | 27475 | 29834 | 30564 |
| Biosynthesis of type II polyketide backbone              | 15    | 75    | 205   | 218   | 95    | 125   | 85    | 5     | 140   | 110   | 125   | 165   | 135   | 165   |
| Biosynthesis of type II polyketide products              | 4     | 17    | 55    | 55    | 25    | 32    | 24    | 2     | 33    | 28    | 33    | 47    | 35    | 44    |
| Biosynthesis of unsaturated fatty acids                  | 56356 | 54543 | 52742 | 54638 | 57104 | 58528 | 57628 | 58258 | 58960 | 57366 | 57327 | 56294 | 58297 | 58706 |
| Biosynthesis of vancomycin group antibiotics             | 885   | 1342  | 2587  | 1969  | 1353  | 863   | 1589  | 360   | 2999  | 3725  | 2023  | 2164  | 1668  | 1258  |
| Biotin metabolism                                        | 28214 | 27191 | 26961 | 27491 | 28632 | 28798 | 29648 | 28894 | 31060 | 30171 | 29315 | 27939 | 29092 | 28905 |
| Bisphenol degradation                                    | 39900 | 37674 | 36312 | 37550 | 40243 | 42326 | 41123 | 42836 | 38514 | 36669 | 38741 | 37664 | 40040 | 41446 |
| Bladder cancer                                           | 23    | 23    | 94    | 107   | 68    | 94    | 86    | 16    | 49    | 113   | 66    | 99    | 80    | 108   |
|                                                          | 15754 | 15452 | 15817 | 16129 | 16178 | 16353 | 16377 | 15838 | 16038 | 16392 | 16223 | 16260 | 16245 | 16558 |
| Butanoate metabolism                                     | 9     | 4     | 2     | 3     | 8     | 7     | 0     | 0     | 5     | 4     | 6     | 8     | 1     | 8     |
| Butirosin and neomycin biosynthesis                      | 5850  | 5956  | 7082  | 6645  | 6266  | 5813  | 6796  | 5262  | 7499  | 7864  | 6579  | 6869  | 6519  | 6157  |
| C5-Branched dibasic acid metabolism                      | 48767 | 46900 | 45519 | 47342 | 48462 | 49266 | 50428 | 49367 | 52528 | 51526 | 49544 | 48223 | 49552 | 49524 |
| CAM ligands                                              | 0     | 0     | 0     | 0     | 0     | 0     | 0     | 0     | 0     | 0     | 0     | 0     | 0     | 0     |
| Caffeine metabolism                                      | 310   | 104   | 600   | 442   | 334   | 191   | 440   | 36    | 41    | 69    | 47    | 72    | 56    | 75    |
| Calcium signaling pathway                                | 177   | 365   | 504   | 442   | 334   | 168   | 133   | 65    | 1177  | 1340  | 662   | 581   | 538   | 342   |
| Caprolactam degradation                                  | 16520 | 15213 | 18362 | 18810 | 17927 | 18155 | 18844 | 15261 | 15155 | 17902 | 16856 | 17907 | 17092 | 18550 |
| Carbohydrate digestion and absorption                    | 5075  | 4898  | 4841  | 4903  | 5196  | 5049  | 5310  | 5023  | 5532  | 5463  | 4918  | 4836  | 5197  | 5014  |
| Carbohydrate metabolism                                  | 52518 | 49552 | 50084 | 50181 | 52433 | 52702 | 54131 | 52821 | 55200 | 52291 | 51515 | 49220 | 51866 | 51506 |
| Carbon fixation in photosynthetic organisms              | 63864 | 67007 | 72598 | 71191 | 68337 | 64470 | 67857 | 60982 | 85703 | 86719 | 72013 | 71287 | 71254 | 67043 |



|                                                            |       |       |       |       |       |       |       |       |       |       |       |       |       |       |
|------------------------------------------------------------|-------|-------|-------|-------|-------|-------|-------|-------|-------|-------|-------|-------|-------|-------|
| D-Alanine metabolism                                       | 26997 | 26505 | 25139 | 25593 | 26990 | 27856 | 27334 | 28958 | 27707 | 26876 | 27530 | 26491 | 27560 | 27773 |
| D-Arginine and D-ornithine metabolism                      | 4677  | 4455  | 4183  | 4357  | 4643  | 4733  | 4651  | 4886  | 4228  | 4214  | 4532  | 4391  | 4584  | 4705  |
| D-Glutamine and D-glutamate metabolism                     | 25084 | 25316 | 26617 | 26187 | 25899 | 25293 | 26049 | 24673 | 28394 | 27702 | 25701 | 25332 | 25790 | 25168 |
|                                                            | 38058 | 39620 | 41425 | 41049 | 39765 | 38469 | 39368 | 37234 | 45780 | 45244 | 40399 | 40333 | 40517 | 39057 |
| DNA repair and recombination proteins                      | 3     | 3     | 7     | 7     | 5     | 9     | 3     | 7     | 3     | 4     | 2     | 7     | 4     | 2     |
| DNA replication                                            | 82750 | 87366 | 92177 | 90762 | 87056 | 83414 | 85560 | 80681 | 99647 | 96932 | 85934 | 86150 | 87244 | 83631 |
|                                                            | 14063 | 14839 | 15700 | 15464 | 14778 | 14149 | 14624 | 13639 | 17135 | 16779 | 14780 | 14793 | 14894 | 14257 |
| DNA replication proteins                                   | 9     | 7     | 8     | 2     | 3     | 7     | 7     | 1     | 9     | 7     | 3     | 1     | 9     | 4     |
| Dilated cardiomyopathy (DCM)                               | 0     | 0     | 0     | 0     | 0     | 0     | 0     | 0     | 0     | 0     | 0     | 0     | 0     | 0     |
| Dioxin degradation                                         | 18133 | 18677 | 18475 | 18428 | 18718 | 19364 | 18363 | 19656 | 20326 | 21136 | 20519 | 20357 | 20036 | 20228 |
| Drug metabolism - cytochrome P450                          | 16920 | 18374 | 20328 | 20115 | 18718 | 17716 | 17340 | 16163 | 24897 | 27706 | 21084 | 21149 | 20481 | 19393 |
| Drug metabolism - other enzymes                            | 47232 | 46920 | 46021 | 46421 | 47409 | 48616 | 48774 | 48868 | 47778 | 47042 | 47413 | 46572 | 47582 | 48205 |
| ECM-receptor interaction                                   | 0     | 0     | 0     | 0     | 0     | 0     | 0     | 0     | 0     | 0     | 0     | 0     | 0     | 0     |
| Electron transfer carriers                                 | 8971  | 8650  | 7999  | 8349  | 8991  | 9307  | 8950  | 9491  | 9299  | 8821  | 9019  | 8579  | 9117  | 9207  |
| Endocrine and other factor-regulated calcium reabsorption  | 0     | 0     | 0     | 0     | 0     | 0     | 0     | 0     | 0     | 0     | 0     | 1     | 1     | 0     |
| Endocytosis                                                | 8     | 3     | 19    | 26    | 16    | 26    | 38    | 7     | 6     | 41    | 16    | 28    | 17    | 34    |
|                                                            | 11334 | 11122 | 11216 | 11439 | 11592 | 11634 | 11943 | 11343 | 12233 | 12186 | 11647 | 11553 | 11745 | 11719 |
| Energy metabolism                                          | 5     | 6     | 4     | 9     | 5     | 8     | 2     | 7     | 4     | 9     | 7     | 2     | 5     | 5     |
| Epithelial cell signaling in Helicobacter pylori infection | 10392 | 10247 | 9622  | 10135 | 10049 | 10211 | 10711 | 10146 | 11300 | 11524 | 10480 | 10093 | 10239 | 10233 |
| ErbB signaling pathway                                     | 0     | 0     | 0     | 0     | 0     | 0     | 0     | 0     | 0     | 0     | 0     | 0     | 0     | 0     |
| Ether lipid metabolism                                     | 51    | 39    | 178   | 200   | 130   | 178   | 171   | 104   | 131   | 415   | 214   | 304   | 218   | 284   |
| Ethylbenzene degradation                                   | 16578 | 16203 | 16179 | 16781 | 16333 | 16348 | 16473 | 16660 | 16405 | 19623 | 17277 | 17718 | 17068 | 17359 |
| Fat digestion and absorption                               | 0     | 0     | 0     | 0     | 0     | 0     | 0     | 0     | 0     | 0     | 0     | 0     | 0     | 0     |
|                                                            | 11524 | 11282 | 11377 | 11608 | 11688 | 11621 | 11739 | 11405 | 12125 | 11964 | 11727 | 11679 | 11792 | 11729 |
| Fatty acid biosynthesis                                    | 5     | 2     | 0     | 2     | 0     | 1     | 8     | 9     | 3     | 8     | 6     | 3     | 3     | 2     |
| Fatty acid elongation in mitochondria                      | 0     | 0     | 0     | 0     | 0     | 0     | 0     | 0     | 0     | 0     | 0     | 0     | 0     | 0     |
|                                                            | 10150 |       | 10473 | 10671 | 10596 | 10677 | 10652 | 10022 | 10489 | 11237 | 10587 | 10707 | 10614 | 10894 |
| Fatty acid metabolism                                      | 0     | 99174 | 4     | 6     | 9     | 3     | 9     | 1     | 2     | 3     | 5     | 9     | 8     | 7     |
| Fc epsilon RI signaling pathway                            | 0     | 0     | 0     | 0     | 0     | 0     | 0     | 0     | 0     | 0     | 0     | 0     | 0     | 0     |
| Fc gamma R-mediated phagocytosis                           | 8     | 3     | 19    | 26    | 16    | 26    | 38    | 7     | 6     | 41    | 16    | 28    | 17    | 34    |
| Flagellar assembly                                         | 15640 | 14588 | 13685 | 14236 | 15279 | 15686 | 16349 | 15981 | 13940 | 13305 | 14682 | 14416 | 15022 | 15364 |





|                                                            |       |       |       |       |       |       |       |       |       |       |       |       |       |       |
|------------------------------------------------------------|-------|-------|-------|-------|-------|-------|-------|-------|-------|-------|-------|-------|-------|-------|
| sulfate                                                    |       |       |       |       |       |       |       |       |       |       |       |       |       |       |
| Glycosaminoglycan degradation                              | 128   | 122   | 240   | 271   | 124   | 186   | 529   | 70    | 280   | 278   | 445   | 620   | 356   | 387   |
| Glycosphingolipid biosynthesis - ganglio series            | 25    | 66    | 160   | 175   | 84    | 115   | 144   | 9     | 121   | 100   | 96    | 124   | 110   | 135   |
| Glycosphingolipid biosynthesis - globo series              | 5411  | 4816  | 5119  | 5219  | 5125  | 5233  | 6389  | 5022  | 4815  | 4381  | 4924  | 5133  | 5010  | 5141  |
| Glycosphingolipid biosynthesis - lacto and neolacto series | 0     | 0     | 0     | 0     | 0     | 0     | 1     | 0     | 0     | 0     | 0     | 0     | 0     | 0     |
| Glycosylphosphatidylinositol(GPI)-anchor biosynthesis      | 0     | 0     | 0     | 0     | 0     | 0     | 0     | 0     | 0     | 0     | 0     | 0     | 0     | 0     |
| Glycosyltransferases                                       | 45483 | 51100 | 53840 | 52070 | 49124 | 47408 | 46947 | 45314 | 64906 | 67344 | 53286 | 51011 | 51608 | 48868 |
|                                                            | 12640 | 12200 | 12259 | 12563 | 12861 | 12951 | 13192 | 12623 | 13017 | 12798 | 12663 | 12364 | 12758 | 12852 |
| Glyoxylate and dicarboxylate metabolism                    | 0     | 8     | 6     | 2     | 9     | 5     | 9     | 1     | 2     | 0     | 6     | 8     | 6     | 7     |
| GnRH signaling pathway                                     | 8     | 3     | 19    | 26    | 16    | 26    | 38    | 7     | 6     | 41    | 16    | 28    | 17    | 34    |
| Hedgehog signaling pathway                                 | 0     | 0     | 0     | 0     | 0     | 0     | 0     | 0     | 0     | 0     | 0     | 0     | 0     | 0     |
| Hematopoietic cell lineage                                 | 0     | 0     | 0     | 0     | 0     | 0     | 0     | 0     | 0     | 0     | 0     | 0     | 0     | 0     |
| Hepatitis C                                                | 0     | 0     | 0     | 0     | 0     | 0     | 0     | 0     | 0     | 0     | 0     | 0     | 0     | 0     |
|                                                            |       |       |       |       |       |       |       |       |       | 10258 |       |       |       |       |
| Histidine metabolism                                       | 92833 | 90413 | 94870 | 94686 | 94691 | 93597 | 98312 | 90894 | 98168 | 6     | 95349 | 95359 | 95346 | 94989 |
|                                                            |       | 10755 | 11475 | 11241 | 10595 | 10070 | 10388 |       | 12674 | 12452 | 10670 | 10660 | 10713 | 10178 |
| Homologous recombination                                   | 99688 | 1     | 8     | 1     | 4     | 9     | 3     | 96254 | 2     | 7     | 4     | 1     | 2     | 0     |
| Huntington's disease                                       | 14726 | 14841 | 14394 | 15164 | 15353 | 14796 | 14404 | 14832 | 18429 | 16425 | 15642 | 15719 | 16175 | 15295 |
| Hypertrophic cardiomyopathy (HCM)                          | 1     | 0     | 1     | 0     | 1     | 1     | 3     | 0     | 0     | 2     | 0     | 3     | 3     | 4     |
| Indole alkaloid biosynthesis                               | 3     | 14    | 31    | 35    | 16    | 21    | 12    | 1     | 25    | 19    | 20    | 25    | 23    | 27    |
| Influenza A                                                | 110   | 265   | 323   | 385   | 224   | 72    | 43    | 28    | 703   | 310   | 150   | 215   | 252   | 95    |
| Inorganic ion transport and metabolism                     | 24932 | 24470 | 25711 | 26016 | 25771 | 26157 | 26615 | 25544 | 28837 | 30280 | 28884 | 29881 | 28273 | 28241 |
| Inositol phosphate metabolism                              | 59653 | 55887 | 56091 | 56561 | 59868 | 61238 | 61212 | 61654 | 58673 | 53680 | 56654 | 54649 | 58291 | 58999 |
| Insulin signaling pathway                                  | 6766  | 7396  | 8340  | 8136  | 7529  | 6539  | 7187  | 5715  | 11878 | 13252 | 8956  | 8690  | 8468  | 7459  |
| Ion channels                                               | 5042  | 5735  | 6418  | 5977  | 5320  | 5164  | 5250  | 5044  | 6131  | 6502  | 5515  | 5265  | 5189  | 5106  |
| Isoflavonoid biosynthesis                                  | 93    | 53    | 167   | 118   | 231   | 129   | 154   | 128   | 143   | 317   | 181   | 370   | 347   | 267   |
| Isoquinoline alkaloid biosynthesis                         | 5632  | 5344  | 6019  | 6059  | 5992  | 5658  | 6253  | 5248  | 6568  | 6674  | 6012  | 6392  | 6218  | 5985  |
| Leishmaniasis                                              | 0     | 0     | 0     | 0     | 0     | 0     | 0     | 0     | 0     | 0     | 0     | 0     | 0     | 0     |
| Leukocyte transendothelial migration                       | 0     | 0     | 0     | 0     | 0     | 0     | 0     | 0     | 0     | 0     | 0     | 0     | 0     | 0     |
| Limonene and pinene degradation                            | 76251 | 71646 | 72386 | 74738 | 77399 | 79793 | 79098 | 78683 | 72518 | 74945 | 75768 | 75269 | 76937 | 79943 |
| Linoleic acid metabolism                                   | 13932 | 13322 | 13058 | 13430 | 13926 | 14604 | 14467 | 14619 | 13048 | 13068 | 13433 | 13339 | 13743 | 14367 |

|                                                 |       |       |       |       |       |       |       |       |       |       |       |       |       |       |
|-------------------------------------------------|-------|-------|-------|-------|-------|-------|-------|-------|-------|-------|-------|-------|-------|-------|
|                                                 | 14032 | 13888 | 14158 | 14439 | 14423 | 14385 | 14501 | 13892 | 15175 | 15213 | 14541 | 14494 | 14605 | 14580 |
| Lipid biosynthesis proteins                     | 7     | 9     | 7     | 7     | 5     | 5     | 1     | 8     | 3     | 5     | 3     | 3     | 0     | 6     |
| Lipid metabolism                                | 11831 | 12306 | 14788 | 14384 | 13412 | 12206 | 13218 | 10595 | 16970 | 17839 | 14259 | 14836 | 14339 | 13265 |
| Lipoic acid metabolism                          | 15302 | 15856 | 16064 | 16274 | 15866 | 15292 | 14995 | 14962 | 19277 | 18853 | 16545 | 16002 | 16326 | 15602 |
| Lipopolysaccharide biosynthesis                 | 1760  | 2802  | 4555  | 4144  | 3373  | 2364  | 2696  | 788   | 8773  | 10762 | 5362  | 5373  | 4947  | 3672  |
| Lipopolysaccharide biosynthesis proteins        | 7160  | 9077  | 12090 | 10794 | 9283  | 7994  | 8841  | 6038  | 15666 | 18395 | 12136 | 12538 | 11265 | 9758  |
| Long-term depression                            | 0     | 0     | 0     | 0     | 0     | 0     | 0     | 0     | 0     | 0     | 0     | 0     | 0     | 0     |
| Long-term potentiation                          | 0     | 0     | 0     | 0     | 0     | 0     | 0     | 0     | 0     | 0     | 0     | 0     | 0     | 0     |
|                                                 | 10208 | 10219 | 10498 | 10573 | 10450 | 10259 | 10649 | 10007 | 11460 | 11310 | 10588 | 10589 | 10623 | 10408 |
| Lysine biosynthesis                             | 3     | 2     | 7     | 7     | 3     | 7     | 9     | 7     | 5     | 7     | 0     | 6     | 1     | 2     |
| Lysine degradation                              | 67351 | 63718 | 68140 | 69488 | 69321 | 69099 | 70714 | 64682 | 63683 | 66522 | 65311 | 65794 | 66393 | 68512 |
| Lysosome                                        | 434   | 233   | 328   | 386   | 169   | 318   | 1118  | 238   | 628   | 446   | 246   | 530   | 351   | 345   |
| MAPK signaling pathway                          | 0     | 0     | 0     | 0     | 0     | 0     | 0     | 0     | 0     | 0     | 0     | 0     | 0     | 0     |
| MAPK signaling pathway - yeast                  | 9709  | 9336  | 8682  | 9062  | 9839  | 9889  | 9627  | 10272 | 10108 | 10636 | 10148 | 10309 | 10540 | 10381 |
| Measles                                         | 0     | 0     | 0     | 0     | 0     | 0     | 0     | 0     | 0     | 0     | 0     | 0     | 0     | 0     |
| Meiosis - yeast                                 | 4760  | 5295  | 5455  | 5448  | 5424  | 5140  | 4688  | 4869  | 8627  | 8867  | 6593  | 6049  | 6246  | 5688  |
| Melanogenesis                                   | 9     | 4     | 26    | 30    | 25    | 37    | 28    | 6     | 9     | 45    | 20    | 31    | 32    | 34    |
| Membrane and intracellular structural molecules | 76070 | 75917 | 75437 | 76980 | 79219 | 78798 | 79219 | 78638 | 91254 | 89106 | 82867 | 81448 | 83611 | 81160 |
| Metabolism of cofactors and vitamins            | 30382 | 29470 | 30113 | 30555 | 30444 | 30509 | 31224 | 30260 | 32728 | 34375 | 31979 | 31223 | 31157 | 31181 |
| Metabolism of xenobiotics by cytochrome P450    | 16689 | 18296 | 20096 | 19892 | 18404 | 17456 | 16971 | 15915 | 24640 | 27068 | 20541 | 20231 | 19872 | 18811 |
|                                                 | 15729 | 15801 | 16201 | 16188 | 16220 | 16212 | 16705 | 15809 | 17892 | 18077 | 16551 | 16275 | 16533 | 16352 |
| Methane metabolism                              | 6     | 8     | 9     | 8     | 2     | 1     | 3     | 8     | 1     | 4     | 3     | 0     | 4     | 6     |
| Mineral absorption                              | 5428  | 5628  | 5805  | 5840  | 5721  | 5393  | 5314  | 5142  | 7966  | 8372  | 6829  | 6651  | 6453  | 5981  |
|                                                 | 10354 | 10940 | 11523 | 11351 | 10868 | 10432 | 10760 | 10061 | 12645 | 12354 | 10937 | 10931 | 10988 | 10527 |
| Mismatch repair                                 | 7     | 2     | 1     | 3     | 5     | 5     | 8     | 7     | 3     | 4     | 9     | 7     | 3     | 4     |
| N-Glycan biosynthesis                           | 4656  | 4945  | 4853  | 4888  | 5014  | 4899  | 4575  | 4825  | 7527  | 7421  | 5881  | 5416  | 5660  | 5232  |
| NOD-like receptor signaling pathway             | 5082  | 5085  | 4868  | 5129  | 5015  | 4969  | 5235  | 4978  | 6178  | 5913  | 5807  | 5744  | 5471  | 5328  |
| Naphthalene degradation                         | 58732 | 58501 | 58268 | 59503 | 59529 | 60827 | 59442 | 60688 | 60733 | 65089 | 60756 | 60063 | 60514 | 61827 |
| Neuroactive ligand-receptor interaction         | 2     | 13    | 31    | 34    | 15    | 20    | 11    | 0     | 24    | 17    | 19    | 22    | 20    | 24    |
| Neurotrophin signaling pathway                  | 0     | 0     | 0     | 0     | 0     | 0     | 0     | 0     | 0     | 0     | 0     | 0     | 0     | 0     |
| Nicotinate and nicotinamide metabolism          | 57218 | 58304 | 62168 | 60990 | 59810 | 58156 | 60621 | 55668 | 65884 | 68901 | 61535 | 61543 | 61005 | 59659 |
|                                                 | 16335 | 15715 | 15216 | 15613 | 16411 | 16767 | 16868 | 16929 | 16882 | 16336 | 16443 | 15966 | 16614 | 16700 |
| Nitrogen metabolism                             | 0     | 4     | 8     | 0     | 5     | 3     | 9     | 9     | 6     | 8     | 5     | 1     | 9     | 4     |

|                                           |       |       |       |       |       |       |       |       |       |       |       |       |       |       |
|-------------------------------------------|-------|-------|-------|-------|-------|-------|-------|-------|-------|-------|-------|-------|-------|-------|
| Nitrotoluene degradation                  | 956   | 745   | 2384  | 2065  | 1514  | 1250  | 2411  | 240   | 1640  | 2304  | 1251  | 1605  | 1274  | 1339  |
| Non-homologous end-joining                | 13883 | 12960 | 12227 | 12824 | 13767 | 14378 | 14102 | 14438 | 12825 | 12102 | 13680 | 13755 | 14021 | 14416 |
| Notch signaling pathway                   | 0     | 0     | 0     | 0     | 0     | 0     | 0     | 0     | 0     | 0     | 0     | 0     | 0     | 0     |
| Novobiocin biosynthesis                   | 15587 | 15080 | 15665 | 15969 | 16146 | 15779 | 16744 | 15145 | 17519 | 17751 | 16157 | 16237 | 16489 | 16156 |
| Nucleotide excision repair                | 55653 | 57227 | 59739 | 59057 | 57750 | 56489 | 58320 | 54787 | 64242 | 62664 | 58124 | 58453 | 58523 | 56984 |
| Nucleotide metabolism                     | 9059  | 8768  | 9435  | 8913  | 9063  | 9318  | 9882  | 9565  | 8933  | 8674  | 9511  | 9499  | 9210  | 9356  |
| Olfactory transduction                    | 0     | 0     | 0     | 0     | 0     | 0     | 0     | 0     | 0     | 0     | 0     | 0     | 0     | 0     |
| One carbon pool by folate                 | 71123 | 73268 | 76391 | 75810 | 74010 | 72321 | 74721 | 69955 | 84060 | 83026 | 74896 | 74580 | 75225 | 73021 |
| Oocyte meiosis                            | 0     | 0     | 0     | 0     | 0     | 0     | 0     | 0     | 0     | 0     | 0     | 0     | 0     | 0     |
| Other glycan degradation                  | 10733 | 9404  | 10316 | 10000 | 9713  | 10174 | 13152 | 10100 | 11315 | 9711  | 9405  | 9784  | 9777  | 9646  |
|                                           | 41515 | 40935 | 38885 | 39654 | 41723 | 42762 | 41897 | 43706 | 41804 | 39741 | 40815 | 39285 | 41516 | 41861 |
| Other ion-coupled transporters            | 0     | 9     | 9     | 6     | 3     | 7     | 2     | 8     | 3     | 5     | 0     | 5     | 2     | 7     |
| Other transporters                        | 30610 | 31238 | 32406 | 32138 | 31554 | 30809 | 32179 | 30043 | 37666 | 37806 | 33258 | 32661 | 32734 | 31580 |
| Other types of O-glycan biosynthesis      | 0     | 0     | 0     | 0     | 0     | 0     | 0     | 0     | 0     | 0     | 0     | 0     | 0     | 0     |
|                                           | 27156 | 26629 | 26502 | 26677 | 27560 | 27724 | 27733 | 28038 | 29501 | 29401 | 28442 | 27847 | 28419 | 28156 |
| Others                                    | 0     | 9     | 7     | 8     | 8     | 3     | 8     | 5     | 7     | 1     | 8     | 6     | 0     | 6     |
|                                           | 17989 | 18628 | 19238 | 19541 | 19009 | 18207 | 18423 | 17595 | 23178 | 22581 | 20131 | 20087 | 20020 | 19064 |
| Oxidative phosphorylation                 | 6     | 2     | 4     | 4     | 9     | 9     | 1     | 4     | 0     | 4     | 1     | 4     | 0     | 1     |
| PPAR signaling pathway                    | 16658 | 16840 | 19240 | 19379 | 18117 | 17852 | 18167 | 15611 | 20183 | 22994 | 19216 | 19585 | 18686 | 18950 |
| Pancreatic cancer                         | 0     | 0     | 0     | 0     | 0     | 0     | 0     | 0     | 0     | 0     | 0     | 0     | 0     | 0     |
| Pancreatic secretion                      | 2     | 13    | 31    | 34    | 15    | 20    | 11    | 0     | 24    | 17    | 19    | 23    | 21    | 24    |
|                                           |       |       |       |       |       |       |       |       | 10336 | 10451 |       |       |       |       |
| Pantothenate and CoA biosynthesis         | 90399 | 90196 | 92331 | 92770 | 92723 | 91705 | 94992 | 89823 | 7     | 5     | 96030 | 94693 | 95349 | 93582 |
| Parkinson's disease                       | 464   | 1022  | 1242  | 1506  | 931   | 328   | 249   | 129   | 2749  | 1316  | 597   | 862   | 1024  | 392   |
| Pathogenic Escherichia coli infection     | 0     | 0     | 0     | 0     | 0     | 0     | 0     | 0     | 0     | 0     | 0     | 0     | 0     | 0     |
| Pathways in cancer                        | 10273 | 10466 | 10226 | 10755 | 10449 | 10061 | 10222 | 9938  | 12967 | 11654 | 10579 | 10321 | 10688 | 10129 |
| Penicillin and cephalosporin biosynthesis | 9573  | 8939  | 8982  | 9227  | 9519  | 9806  | 9798  | 9905  | 9933  | 9970  | 10126 | 10049 | 10004 | 10137 |
|                                           | 15632 | 14748 | 14455 | 14550 | 15393 | 15857 | 16199 | 16104 | 14969 | 13613 | 14296 | 13577 | 14722 | 14941 |
| Pentose and glucuronate interconversions  | 2     | 7     | 2     | 8     | 9     | 1     | 8     | 7     | 6     | 7     | 1     | 6     | 1     | 0     |
|                                           | 13213 | 13410 | 13754 | 13552 | 13526 | 13482 | 13788 | 13325 | 15040 | 14971 | 13696 | 13371 | 13680 | 13445 |
| Pentose phosphate pathway                 | 3     | 4     | 5     | 2     | 3     | 8     | 8     | 5     | 1     | 5     | 9     | 9     | 4     | 7     |
|                                           | 32921 | 33052 | 33215 | 33476 | 33855 | 33489 | 33985 | 33044 | 37498 | 37484 | 35259 | 34606 | 34945 | 34284 |
| Peptidases                                | 2     | 4     | 4     | 7     | 5     | 0     | 0     | 9     | 5     | 9     | 1     | 5     | 3     | 6     |

|                                                     |       |       |       |       |       |       |       |       |       |       |       |       |       |       |
|-----------------------------------------------------|-------|-------|-------|-------|-------|-------|-------|-------|-------|-------|-------|-------|-------|-------|
|                                                     | 10350 | 10995 | 11558 | 11338 | 10817 | 10442 | 10756 | 10109 | 12566 | 12506 | 11114 | 11118 | 11029 | 10623 |
| Peptidoglycan biosynthesis                          | 9     | 7     | 9     | 4     | 7     | 6     | 3     | 4     | 9     | 1     | 4     | 8     | 2     | 7     |
| Peroxisome                                          | 52200 | 50810 | 49485 | 51131 | 53207 | 54013 | 53285 | 53767 | 55430 | 54319 | 53338 | 52484 | 54271 | 54414 |
| Pertussis                                           | 236   | 396   | 671   | 611   | 470   | 351   | 383   | 100   | 1254  | 1574  | 785   | 761   | 704   | 528   |
| Phagosome                                           | 0     | 0     | 0     | 0     | 0     | 0     | 0     | 0     | 0     | 0     | 0     | 0     | 0     | 0     |
| Phenylalanine metabolism                            | 28940 | 27089 | 32137 | 32189 | 31444 | 30197 | 32425 | 26753 | 32327 | 36755 | 32725 | 35334 | 33107 | 33001 |
|                                                     | 10667 | 10309 | 10316 | 10577 | 10828 | 10757 | 11376 | 10523 | 11731 | 11928 | 11061 | 10958 | 11136 | 10989 |
| Phenylalanine, tyrosine and tryptophan biosynthesis | 8     | 7     | 2     | 4     | 3     | 2     | 7     | 3     | 8     | 0     | 2     | 5     | 7     | 0     |
| Phenylpropanoid biosynthesis                        | 23986 | 22021 | 22341 | 22440 | 23760 | 24144 | 27021 | 24185 | 25859 | 24085 | 23510 | 22983 | 24170 | 23833 |
| Phosphatidylinositol signaling system               | 15708 | 16857 | 18050 | 17559 | 16662 | 15843 | 16103 | 15196 | 20260 | 20267 | 17632 | 17655 | 17306 | 16440 |
| Phosphonate and phosphinate metabolism              | 9236  | 8485  | 7830  | 8340  | 8829  | 9413  | 9748  | 9895  | 8776  | 8686  | 9662  | 9762  | 9564  | 9801  |
|                                                     | 23201 | 21410 | 20700 | 21030 | 22832 | 23569 | 23503 | 24306 | 20795 | 18649 | 21025 | 19849 | 21716 | 22235 |
| Phosphotransferase system (PTS)                     | 4     | 0     | 0     | 6     | 6     | 3     | 3     | 0     | 5     | 2     | 8     | 3     | 9     | 0     |
|                                                     |       |       |       |       |       |       |       |       | 12174 | 12967 |       |       |       |       |
| Photosynthesis                                      | 51770 | 66060 | 76996 | 72345 | 63506 | 51796 | 52498 | 44042 | 7     | 3     | 82938 | 78113 | 75948 | 62257 |
| Photosynthesis - antenna proteins                   | 3013  | 6205  | 8568  | 7518  | 5670  | 2860  | 2261  | 1109  | 20013 | 22780 | 11250 | 9881  | 9146  | 5810  |
|                                                     |       |       |       |       |       |       |       |       | 14729 | 15807 |       |       |       |       |
| Photosynthesis proteins                             | 59752 | 77121 | 90320 | 84742 | 74204 | 59654 | 59696 | 50162 | 0     | 9     | 99159 | 92749 | 90161 | 73028 |
| Phototransduction                                   | 0     | 0     | 0     | 0     | 0     | 0     | 0     | 0     | 0     | 0     | 0     | 0     | 0     | 0     |
| Phototransduction - fly                             | 0     | 0     | 0     | 0     | 0     | 0     | 0     | 0     | 0     | 0     | 0     | 0     | 0     | 0     |
| Plant-pathogen interaction                          | 20186 | 20163 | 20655 | 20752 | 20335 | 20191 | 21705 | 19761 | 21653 | 21137 | 21008 | 20939 | 20552 | 20439 |
| Polycyclic aromatic hydrocarbon degradation         | 33274 | 33621 | 35638 | 34931 | 34843 | 35209 | 35136 | 34434 | 36319 | 37264 | 34620 | 34188 | 34873 | 35192 |
| Polyketide sugar unit biosynthesis                  | 3807  | 5540  | 9964  | 7714  | 5105  | 3319  | 5608  | 1572  | 11140 | 13682 | 6926  | 7318  | 5758  | 4287  |
| Pores ion channels                                  | 24254 | 27249 | 29303 | 29234 | 26798 | 24482 | 25339 | 21902 | 41461 | 46217 | 33133 | 31946 | 30810 | 27940 |
|                                                     | 11587 | 11890 | 13007 | 12938 | 12536 | 11614 | 12216 | 10750 | 17072 | 17618 | 14389 | 14277 | 13850 | 12815 |
| Porphyrin and chlorophyll metabolism                | 6     | 6     | 2     | 9     | 6     | 3     | 3     | 0     | 6     | 6     | 5     | 1     | 2     | 0     |
| Prenyltransferases                                  | 51903 | 54764 | 56741 | 56733 | 54691 | 52450 | 52558 | 50640 | 68463 | 68285 | 58440 | 57419 | 57535 | 54638 |
| Primary bile acid biosynthesis                      | 4169  | 4299  | 4353  | 4282  | 4355  | 4681  | 4805  | 4673  | 4288  | 4094  | 4155  | 4036  | 4258  | 4493  |
| Primary immunodeficiency                            | 5124  | 4997  | 5154  | 5344  | 5273  | 5339  | 5557  | 5055  | 5721  | 5886  | 5427  | 5415  | 5462  | 5482  |
| Prion diseases                                      | 4286  | 3925  | 3596  | 3722  | 4429  | 4600  | 4416  | 4813  | 4165  | 3881  | 4415  | 4606  | 4788  | 4767  |
| Progesterone-mediated oocyte maturation             | 5080  | 5085  | 4868  | 5114  | 5009  | 4967  | 5216  | 4904  | 6113  | 5560  | 5140  | 4918  | 5081  | 4919  |
|                                                     | 16347 | 15605 | 16004 | 16392 | 16698 | 16815 | 17036 | 16255 | 15946 | 16205 | 16345 | 16388 | 16530 | 16887 |
| Propanoate metabolism                               | 8     | 2     | 8     | 2     | 8     | 2     | 9     | 7     | 5     | 9     | 2     | 1     | 3     | 6     |

|                                                |       |       |       |       |       |       |       |       |       |       |       |       |       |       |
|------------------------------------------------|-------|-------|-------|-------|-------|-------|-------|-------|-------|-------|-------|-------|-------|-------|
| Prostate cancer                                | 5080  | 5085  | 4868  | 5114  | 5009  | 4967  | 5216  | 4904  | 6113  | 5560  | 5140  | 4918  | 5081  | 4919  |
| Proteasome                                     | 5127  | 5173  | 5155  | 5433  | 5181  | 5205  | 5414  | 4940  | 6289  | 5840  | 5334  | 5199  | 5285  | 5229  |
| Protein digestion and absorption               | 10    | 36    | 91    | 102   | 49    | 68    | 98    | 7     | 69    | 139   | 347   | 446   | 226   | 254   |
|                                                |       | 10354 | 10489 | 10538 | 10269 | 10061 | 10166 |       | 11758 | 11260 | 10289 | 10078 | 10329 | 10029 |
| Protein export                                 | 99617 | 7     | 0     | 7     | 5     | 0     | 8     | 99118 | 4     | 8     | 9     | 1     | 4     | 3     |
| Protein folding and associated processing      | 66562 | 69537 | 77524 | 76161 | 72812 | 67959 | 70439 | 62128 | 95083 | 98886 | 78502 | 78585 | 77731 | 72479 |
|                                                | 15421 | 14886 | 14270 | 14597 | 15398 | 15671 | 15584 | 15933 | 16482 | 15691 | 15795 | 15312 | 15824 | 15721 |
| Protein kinases                                | 1     | 7     | 0     | 7     | 1     | 3     | 5     | 5     | 8     | 5     | 1     | 3     | 6     | 5     |
| Protein processing in endoplasmic reticulum    | 14337 | 14460 | 13942 | 14432 | 14706 | 14644 | 14390 | 14474 | 17657 | 16872 | 15408 | 14543 | 15220 | 14783 |
| Proximal tubule bicarbonate reclamation        | 9582  | 8845  | 9194  | 9224  | 9669  | 9708  | 9855  | 9543  | 9364  | 9053  | 9393  | 9074  | 9413  | 9524  |
|                                                | 33181 | 34178 | 36073 | 35403 | 34390 | 33538 | 34455 | 32454 | 38190 | 38154 | 34437 | 34017 | 34343 | 33517 |
| Purine metabolism                              | 8     | 7     | 8     | 2     | 3     | 9     | 5     | 9     | 2     | 1     | 9     | 4     | 8     | 6     |
|                                                | 24096 | 25034 | 26289 | 25840 | 25013 | 24305 | 25012 | 23603 | 27874 | 27681 | 25152 | 25138 | 25173 | 24463 |
| Pyrimidine metabolism                          | 8     | 5     | 7     | 9     | 8     | 0     | 0     | 8     | 6     | 6     | 0     | 3     | 2     | 4     |
|                                                | 23515 | 23337 | 23646 | 23836 | 24112 | 24031 | 24173 | 23664 | 25272 | 25336 | 24333 | 24020 | 24370 | 24245 |
| Pyruvate metabolism                            | 7     | 2     | 6     | 0     | 1     | 5     | 4     | 6     | 7     | 9     | 8     | 4     | 8     | 1     |
| RIG-I-like receptor signaling pathway          | 443   | 141   | 633   | 481   | 346   | 223   | 570   | 160   | 211   | 320   | 154   | 236   | 165   | 157   |
| RNA degradation                                | 62577 | 65642 | 69025 | 68380 | 65995 | 63051 | 65009 | 60606 | 80561 | 80907 | 69495 | 68530 | 68561 | 65194 |
| RNA polymerase                                 | 25734 | 27573 | 29247 | 28527 | 27211 | 25981 | 26049 | 25104 | 31989 | 31197 | 27270 | 27122 | 27403 | 26103 |
| RNA transport                                  | 20380 | 20920 | 22348 | 21428 | 20957 | 20455 | 21407 | 19940 | 22177 | 22529 | 20618 | 20377 | 20562 | 20154 |
| Regulation of actin cytoskeleton               | 0     | 0     | 0     | 0     | 0     | 0     | 0     | 0     | 0     | 0     | 0     | 0     | 0     | 0     |
| Renal cell carcinoma                           | 5085  | 5129  | 5066  | 5290  | 5231  | 5042  | 4974  | 5006  | 6175  | 5801  | 5308  | 5210  | 5375  | 5139  |
| Renin-angiotensin system                       | 7     | 1     | 2     | 1     | 4     | 2     | 4     | 1     | 1     | 5     | 1     | 7     | 5     | 8     |
|                                                | 11254 | 10191 | 13682 | 12444 | 11494 | 10066 | 12110 |       | 12036 | 12447 | 10410 | 10325 | 10164 |       |
| Replication, recombination and repair proteins | 9     | 7     | 7     | 0     | 3     | 4     | 0     | 89052 | 8     | 0     | 7     | 9     | 0     | 96166 |
| Restriction enzyme                             | 26584 | 26537 | 22910 | 24534 | 26480 | 27743 | 26911 | 28709 | 29203 | 27954 | 27699 | 26180 | 27852 | 27868 |
| Retinol metabolism                             | 15751 | 16520 | 17422 | 17386 | 16552 | 16320 | 15954 | 15546 | 19083 | 20913 | 17507 | 17320 | 17105 | 16965 |
| Rheumatoid arthritis                           | 0     | 0     | 0     | 0     | 0     | 0     | 0     | 0     | 0     | 0     | 0     | 0     | 0     | 0     |
| Riboflavin metabolism                          | 40783 | 41185 | 42961 | 42884 | 42329 | 41237 | 42279 | 39909 | 48718 | 49170 | 44157 | 43483 | 43638 | 42353 |
|                                                | 30275 | 32332 | 33743 | 33249 | 31669 | 30617 | 31084 | 29788 | 37537 | 36033 | 31893 | 31304 | 31820 | 30525 |
| Ribosome                                       | 4     | 5     | 5     | 5     | 1     | 7     | 7     | 6     | 5     | 5     | 5     | 1     | 7     | 8     |
|                                                | 18109 | 18864 | 19491 | 19275 | 18746 | 18351 | 18871 | 17971 | 21434 | 21056 | 19172 | 19061 | 19129 | 18549 |
| Ribosome Biogenesis                            | 4     | 5     | 5     | 4     | 7     | 2     | 8     | 4     | 8     | 8     | 1     | 2     | 2     | 5     |

|                                                       |       |       |       |       |       |       |       |       |       |       |       |       |       |       |
|-------------------------------------------------------|-------|-------|-------|-------|-------|-------|-------|-------|-------|-------|-------|-------|-------|-------|
| Ribosome biogenesis in eukaryotes                     | 5203  | 5598  | 6040  | 5921  | 5591  | 5350  | 5536  | 5051  | 6604  | 6472  | 5578  | 5619  | 5651  | 5404  |
| Salivary secretion                                    | 0     | 0     | 0     | 0     | 0     | 0     | 0     | 0     | 0     | 0     | 0     | 1     | 1     | 0     |
| Secondary bile acid biosynthesis                      | 4096  | 4239  | 4080  | 3957  | 4163  | 4409  | 4534  | 4610  | 4170  | 3711  | 3957  | 3707  | 4048  | 4134  |
|                                                       | 23653 | 24359 | 24658 | 24853 | 24581 | 23976 | 24317 | 23396 | 27873 | 27269 | 24687 | 24309 | 24939 | 24122 |
| Secretion system                                      | 1     | 8     | 1     | 3     | 6     | 5     | 1     | 1     | 5     | 9     | 7     | 5     | 9     | 1     |
| Selenocompound metabolism                             | 72047 | 71315 | 73367 | 73525 | 72978 | 71944 | 74921 | 70225 | 76412 | 77172 | 73643 | 73697 | 73334 | 72758 |
| Sesquiterpenoid biosynthesis                          | 4     | 26    | 62    | 69    | 30    | 40    | 23    | 0     | 48    | 34    | 38    | 44    | 40    | 48    |
| Shigellosis                                           | 0     | 0     | 2     | 0     | 0     | 0     | 0     | 0     | 2     | 0     | 0     | 0     | 0     | 0     |
|                                                       | 11234 | 11144 | 11251 | 11283 | 11471 | 11417 | 11545 | 11288 | 12363 | 12261 | 11580 | 11301 | 11592 | 11443 |
| Signal transduction mechanisms                        | 2     | 8     | 8     | 0     | 5     | 7     | 6     | 7     | 9     | 7     | 8     | 3     | 6     | 9     |
| Small cell lung cancer                                | 108   | 252   | 292   | 351   | 209   | 52    | 32    | 28    | 679   | 293   | 131   | 193   | 232   | 71    |
| Sphingolipid metabolism                               | 10386 | 9707  | 10555 | 10382 | 10120 | 10336 | 12560 | 9985  | 10791 | 10299 | 10189 | 10527 | 10238 | 10316 |
| Spliceosome                                           | 0     | 0     | 0     | 0     | 0     | 0     | 0     | 0     | 0     | 0     | 0     | 0     | 0     | 0     |
|                                                       | 45398 | 42386 | 39115 | 40683 | 44399 | 46005 | 45956 | 47639 | 41073 | 38096 | 42537 | 40875 | 43604 | 44591 |
| Sporulation                                           | 2     | 5     | 9     | 6     | 8     | 9     | 8     | 3     | 5     | 0     | 3     | 1     | 1     | 3     |
| Staphylococcus aureus infection                       | 29555 | 27840 | 24126 | 25677 | 28357 | 30411 | 28779 | 32810 | 27574 | 24417 | 27314 | 24872 | 27909 | 28798 |
|                                                       | 21104 | 20266 | 19714 | 19992 | 21075 | 21414 | 22128 | 21630 | 21877 | 20616 | 20288 | 19397 | 20812 | 20752 |
| Starch and sucrose metabolism                         | 0     | 8     | 2     | 9     | 5     | 2     | 7     | 2     | 3     | 9     | 7     | 1     | 3     | 7     |
| Steroid biosynthesis                                  | 4685  | 4701  | 4673  | 4767  | 4991  | 5015  | 4755  | 4968  | 6663  | 6714  | 5811  | 5779  | 5765  | 5514  |
| Steroid hormone biosynthesis                          | 276   | 445   | 852   | 859   | 592   | 521   | 492   | 153   | 1331  | 1841  | 921   | 1023  | 816   | 806   |
| Stilbenoid, diarylheptanoid and gingerol biosynthesis | 17607 | 16903 | 16263 | 16814 | 18040 | 18742 | 17912 | 18901 | 18583 | 17553 | 18146 | 17404 | 18422 | 18729 |
| Streptomycin biosynthesis                             | 24805 | 26423 | 34152 | 30668 | 27385 | 24548 | 28420 | 21418 | 36151 | 38457 | 29167 | 29682 | 27959 | 25742 |
| Styrene degradation                                   | 9977  | 9567  | 9978  | 10367 | 10534 | 10712 | 10629 | 10049 | 10225 | 11125 | 11014 | 11442 | 11061 | 11412 |
| Sulfur metabolism                                     | 73119 | 69822 | 68025 | 70157 | 72488 | 73386 | 75146 | 73415 | 75418 | 74923 | 74769 | 72629 | 73691 | 74113 |
| Sulfur relay system                                   | 63859 | 62436 | 61513 | 63473 | 64519 | 64555 | 65552 | 64121 | 71984 | 72028 | 66725 | 64246 | 66150 | 65334 |
| Synthesis and degradation of ketone bodies            | 12487 | 13089 | 14380 | 14724 | 13268 | 13089 | 13137 | 11267 | 11257 | 14491 | 13423 | 14713 | 13121 | 13958 |
| Systemic lupus erythematosus                          | 0     | 1     | 3     | 1     | 2     | 1     | 1     | 0     | 1     | 1     | 0     | 1     | 2     | 0     |
| TGF-beta signaling pathway                            | 0     | 0     | 0     | 0     | 0     | 0     | 0     | 0     | 0     | 0     | 0     | 0     | 0     | 0     |
| Taurine and hypotaurine metabolism                    | 28654 | 28285 | 27950 | 28329 | 29030 | 29372 | 29224 | 29209 | 29468 | 29025 | 28699 | 27906 | 28899 | 29090 |
| Terpenoid backbone biosynthesis                       | 77518 | 80956 | 85562 | 84108 | 81051 | 79218 | 80753 | 75713 | 91174 | 94009 | 83397 | 82988 | 82372 | 80670 |
| Tetracycline biosynthesis                             | 39215 | 38153 | 37285 | 38285 | 39413 | 39487 | 39210 | 39444 | 40341 | 40655 | 40295 | 39604 | 40090 | 40053 |
| Thiamine metabolism                                   | 88076 | 86953 | 87985 | 88149 | 89095 | 89049 | 91893 | 88333 | 93537 | 92846 | 88845 | 86570 | 88858 | 88371 |





|                                  |       |       |       |       |       |       |       |       |       |       |       |       |       |       |
|----------------------------------|-------|-------|-------|-------|-------|-------|-------|-------|-------|-------|-------|-------|-------|-------|
| Vibrio cholerae infection        | 0     | 0     | 0     | 0     | 0     | 0     | 0     | 0     | 0     | 0     | 0     | 0     | 0     | 0     |
| Vibrio cholerae pathogenic cycle | 15024 | 15192 | 15014 | 15326 | 15488 | 15123 | 15331 | 14785 | 18392 | 18770 | 16569 | 15690 | 16096 | 15570 |
| Viral myocarditis                | 108   | 252   | 292   | 351   | 209   | 52    | 32    | 28    | 679   | 293   | 131   | 193   | 232   | 71    |
| Vitamin B6 metabolism            | 32831 | 32272 | 30858 | 31836 | 32651 | 33668 | 33875 | 33794 | 35405 | 34583 | 33329 | 31504 | 32972 | 33213 |
| Wnt signaling pathway            | 0     | 0     | 0     | 0     | 0     | 0     | 0     | 0     | 0     | 0     | 0     | 0     | 0     | 0     |
| Xylene degradation               | 9598  | 10092 | 10873 | 10626 | 10247 | 10403 | 10021 | 10165 | 11896 | 13268 | 12070 | 12333 | 11426 | 11513 |
| Zeatin biosynthesis              | 5089  | 5520  | 5760  | 5680  | 5273  | 5112  | 5279  | 4972  | 6456  | 6208  | 5402  | 5219  | 5273  | 5066  |
| alpha-Linolenic acid metabolism  | 5440  | 5489  | 5446  | 5774  | 5666  | 5654  | 5571  | 5214  | 5887  | 6509  | 5665  | 5753  | 5760  | 5837  |
| beta-Alanine metabolism          | 60803 | 58006 | 61791 | 63022 | 63419 | 63756 | 65143 | 59598 | 61288 | 64904 | 62959 | 63882 | 63325 | 65056 |
| beta-Lactam resistance           | 9043  | 8700  | 8146  | 8549  | 9066  | 9415  | 9069  | 9685  | 9510  | 9540  | 10105 | 9959  | 9821  | 9963  |
| mRNA surveillance pathway        | 8     | 3     | 19    | 26    | 16    | 25    | 25    | 7     | 6     | 40    | 16    | 28    | 16    | 33    |
| mTOR signaling pathway           | 0     | 0     | 0     | 0     | 0     | 0     | 0     | 0     | 0     | 0     | 0     | 0     | 0     | 0     |
| p53 signaling pathway            | 109   | 254   | 293   | 353   | 210   | 53    | 33    | 28    | 679   | 293   | 131   | 194   | 232   | 72    |

Table S7. Fungi genera abundance during different fermentation stages of JZ22 and JB3.

| OTU ID                       | JZ22  | JZ22 | JZ22 | JZ22 | JZ22 | JZ22 | JZ22 | JB3   | JB3 | JB3 | JB3 | JB3 | JB3 | JB3 |
|------------------------------|-------|------|------|------|------|------|------|-------|-----|-----|-----|-----|-----|-----|
|                              | D0    | D2   | D4   | D6   | D8   | D10  | D12  | D0    | D2  | D4  | D6  | D8  | D10 | D12 |
| g__Cladosporium              | 28    | 0    | 0    | 0    | 0    | 0    | 1    | 185   | 0   | 0   | 0   | 0   | 0   | 0   |
| g__Cochliobolus              | 11    | 0    | 0    | 0    | 0    | 0    | 0    | 100   | 0   | 0   | 0   | 0   | 0   | 0   |
| g__Cryptosporidium           | 0     | 0    | 0    | 0    | 0    | 0    | 0    | 1     | 0   | 0   | 0   | 0   | 0   | 0   |
| g__Galactomyces              | 0     | 0    | 0    | 0    | 0    | 0    | 0    | 2     | 0   | 0   | 0   | 0   | 0   | 0   |
| g__norank_c__Agaricomycetes  | 10    | 0    | 0    | 0    | 0    | 0    | 0    | 21    | 0   | 0   | 0   | 0   | 0   | 0   |
| g__norank_k__Fungi           | 1737  | 49   | 102  | 22   | 27   | 38   | 20   | 1917  | 24  | 38  | 97  | 53  | 62  | 71  |
| g__norank_o__Malasseziales   | 4     | 0    | 0    | 0    | 0    | 0    | 0    | 11    | 0   | 0   | 0   | 0   | 0   | 0   |
| g__norank_o__Tremellales     | 7     | 0    | 0    | 0    | 0    | 0    | 0    | 4     | 0   | 0   | 0   | 0   | 0   | 0   |
| g__norank_p__Basidiomycota   | 3     | 0    | 0    | 0    | 0    | 0    | 0    | 0     | 0   | 0   | 0   | 0   | 0   | 0   |
| g__norank_p__Chytridiomycota | 2     | 0    | 0    | 0    | 0    | 0    | 0    | 0     | 0   | 0   | 0   | 0   | 0   | 0   |
| g__norank_p__Glomeromycota   | 8     | 0    | 0    | 0    | 0    | 0    | 0    | 0     | 0   | 0   | 0   | 0   | 0   | 0   |
| g__Oryza                     | 30    | 0    | 0    | 1    | 0    | 0    | 0    | 48    | 0   | 2   | 0   | 1   | 1   | 1   |
| g__Pichia                    | 13410 | 89   | 60   | 54   | 39   | 80   | 90   | 19694 | 46  | 38  | 44  | 43  | 42  | 43  |
| g__Saccharomycopsis          | 429   | 12   | 9    | 9    | 5    | 10   | 7    | 631   | 10  | 8   | 6   | 8   | 8   | 7   |
| g__Symbiodinium              | 1     | 0    | 0    | 0    | 0    | 0    | 0    | 36    | 0   | 0   | 0   | 0   | 0   | 0   |
| g__Trichosporon              | 2     | 0    | 0    | 0    | 0    | 0    | 0    | 11    | 0   | 0   | 0   | 0   | 0   | 0   |

|                                    |       |       |       |       |       |       |       |       |       |       |       |       |       |       |
|------------------------------------|-------|-------|-------|-------|-------|-------|-------|-------|-------|-------|-------|-------|-------|-------|
| g_unclassified_d_Eukaryota         | 4     | 0     | 0     | 0     | 0     | 0     | 0     | 0     | 0     | 0     | 0     | 0     | 0     | 0     |
| g_unclassified_f_Colpodea          | 6     | 0     | 0     | 0     | 0     | 0     | 0     | 0     | 0     | 0     | 0     | 0     | 0     | 0     |
| g_unclassified_f_Trichocomaceae    | 2158  | 45    | 22    | 18    | 11    | 35    | 26    | 1893  | 22    | 9     | 7     | 13    | 10    | 10    |
| g_unclassified_o_Hypocreales       | 94    | 0     | 0     | 0     | 0     | 0     | 0     | 36    | 1     | 0     | 0     | 0     | 0     | 0     |
| g_unclassified_o_Saccharomycetales | 22659 | 40411 | 40415 | 40504 | 40526 | 40444 | 40463 | 16017 | 40505 | 40513 | 40453 | 40490 | 40486 | 40476 |
| g_unclassified_p_Ascomycota        | 4     | 0     | 0     | 0     | 0     | 0     | 0     | 0     | 0     | 0     | 0     | 0     | 0     | 0     |

Microbial dynamics and metabolite changes in Chinese Rice Wine fermentation from sorghum with different tannin content  
 Jialiang Xu, Huijun Wu, Zhiwei Wang, Fuping Zheng, Xin Lu, Zhenpeng Li, Qing Ren

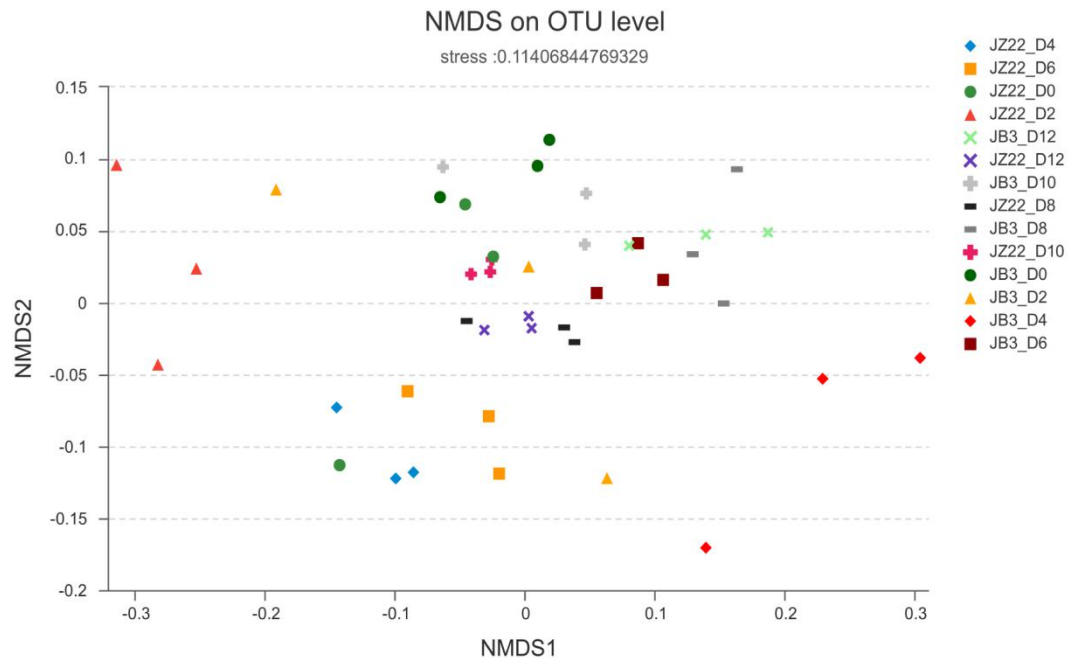

Figure S1. Non-metric Multidimensional Scaling (NMDS) distribution based on Weighted Unifrac distance.
